# Supplementary material for: Trinuclear dioxidomolybdenum(vi) complexes derived from benzene-1,3,5-tricarbohydrazide and study of the catalytic activity
Source: Royal Society of Chemistry journal article supplement (doi:10.1039/d2nj05936c), 2023-01-01
Supplement: d2nj05936c1.pdf [file d2nj05936c1.pdf]

(ESI for New J. Chem) Manuscript ID NJ-ART-12-2022-005936

## Trinuclear dioxidomolybdenum(VI) complexes derived from benzene-1,3,5-tricarbohydrazide and study of catalytic activity

Mannar R. Maurya,\* Devesh Singh, Frnando Avecilla, Akhilesh Sharma and Puneet Gupta

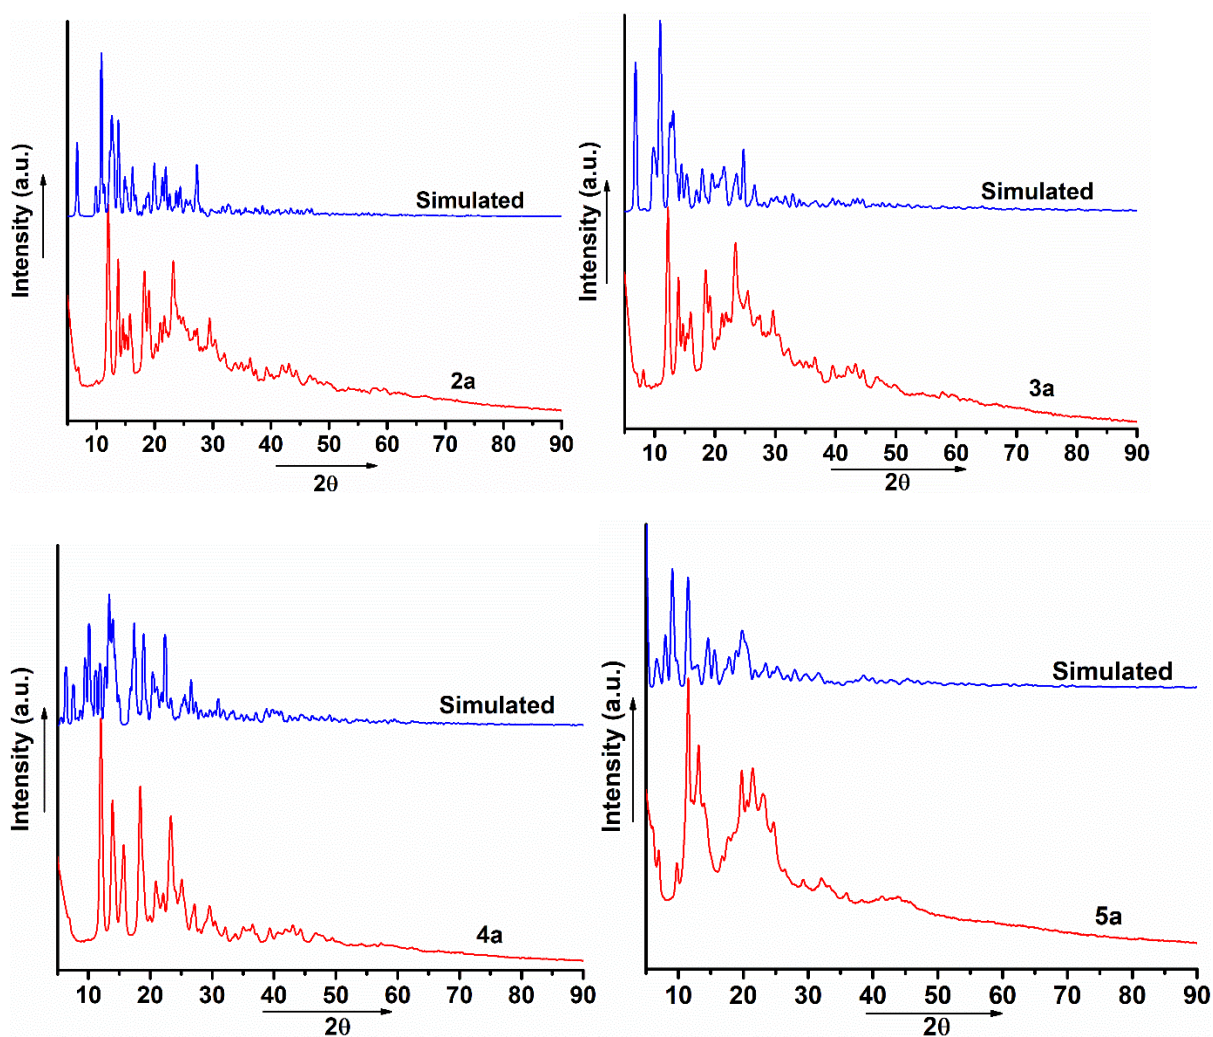

**Fig. S1** P-XRD patterns (red) of complexes **2a**, **3a**, **4a** and **5a** and their comparison with simulated patterns (blue) obtained from SC-XRD.

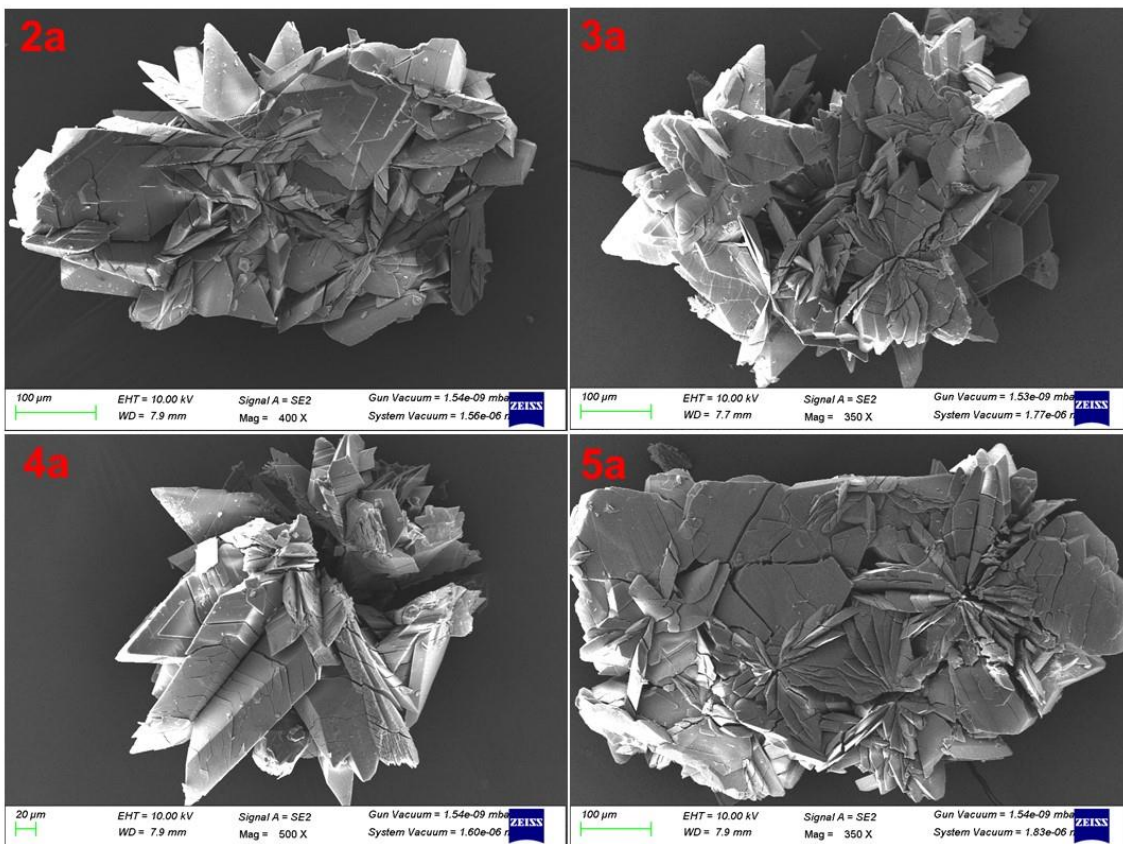

**Fig. S2** Field emission-scanning electron micrograph of complexes (2a–5a).

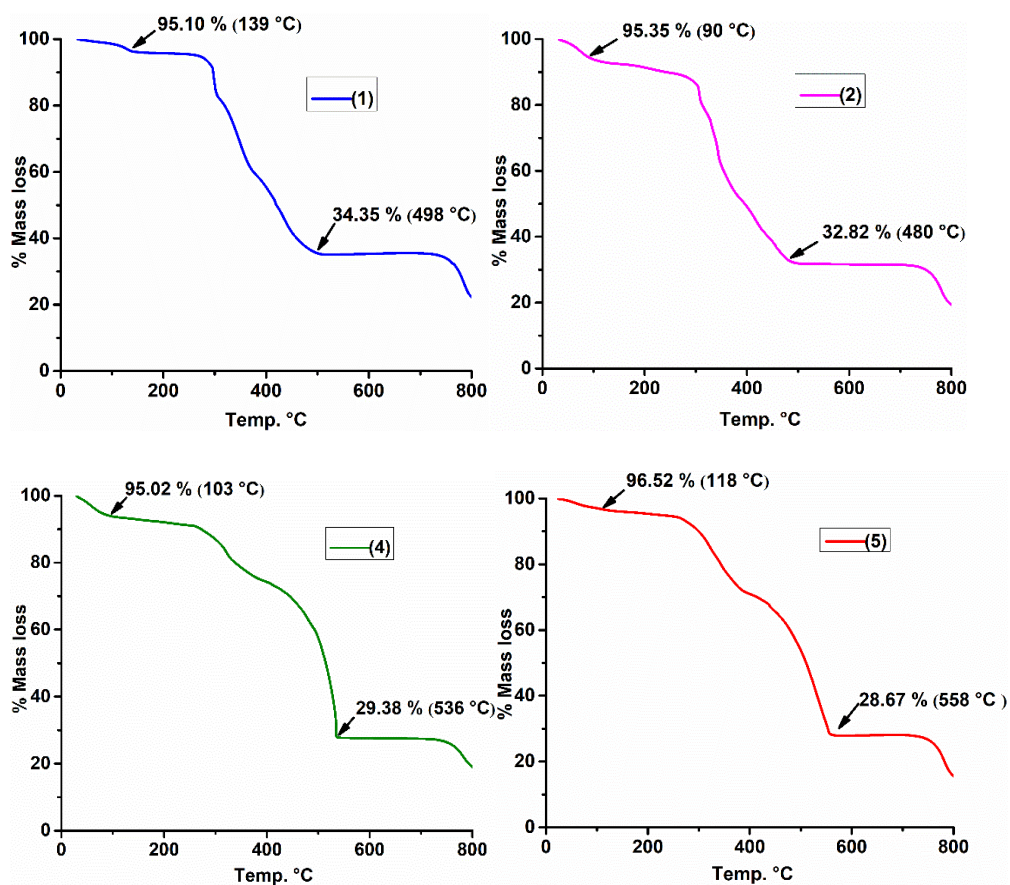

**Fig. S3** TGA profiles of complexes **1**, **2**, **4** and **5** showing mass loss vs. temperature. Beyond 750 °C, MoO<sub>3</sub> starts volatilizing. Arrows point the remaining mass percent at particular temperature.



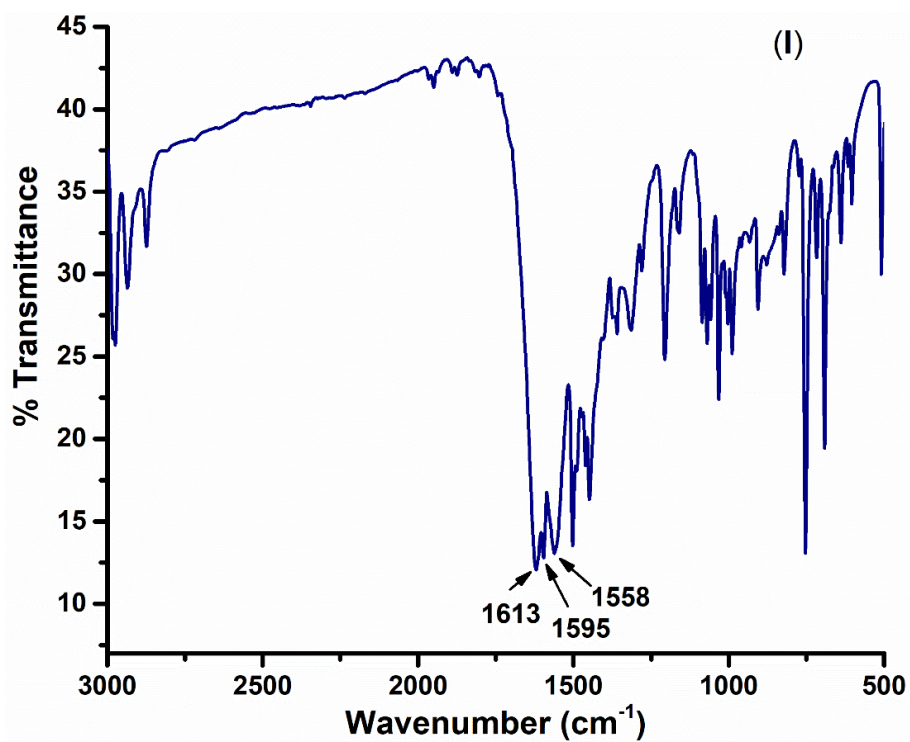

Fig. S4 IR spectrum of  $H_6btzh(fp)_3$  (I)

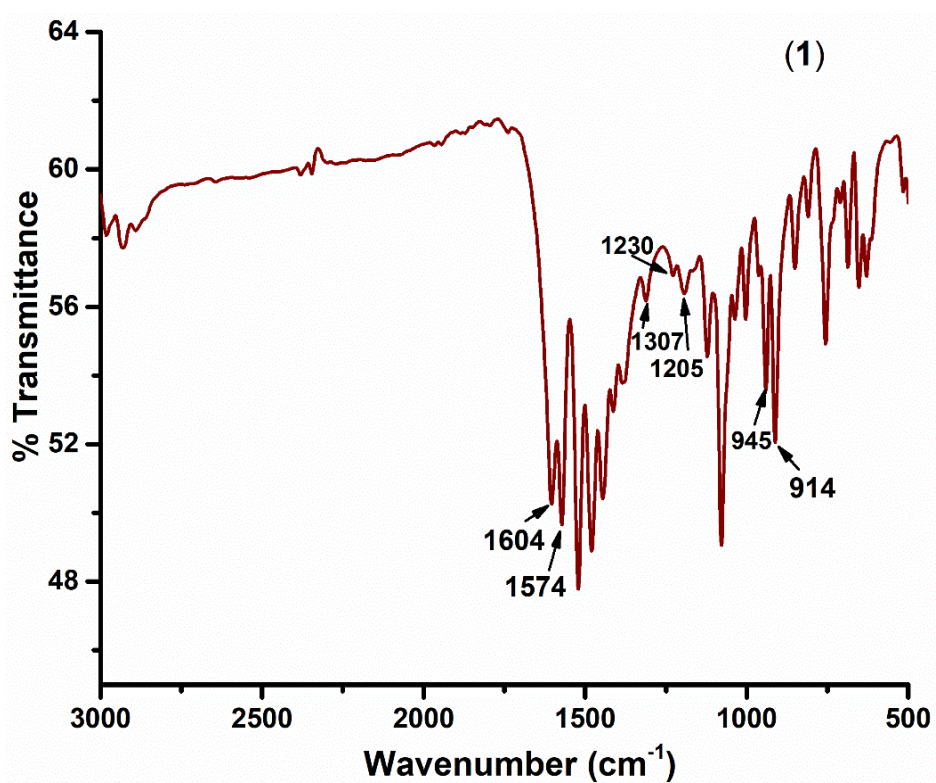

Fig. S5 IR spectrum of  $[Mo^{VI}O_2(H_2O)_3]btzh(fp)_3$  (1).

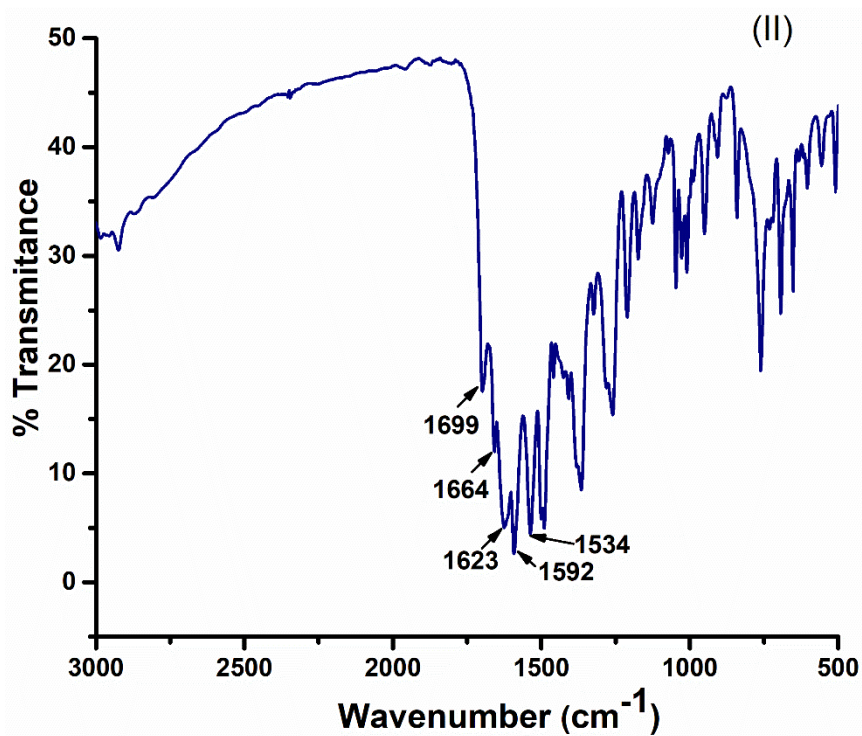

Fig. S6 IR spectrum of  $H_6btzh(mp)_3$  (II).

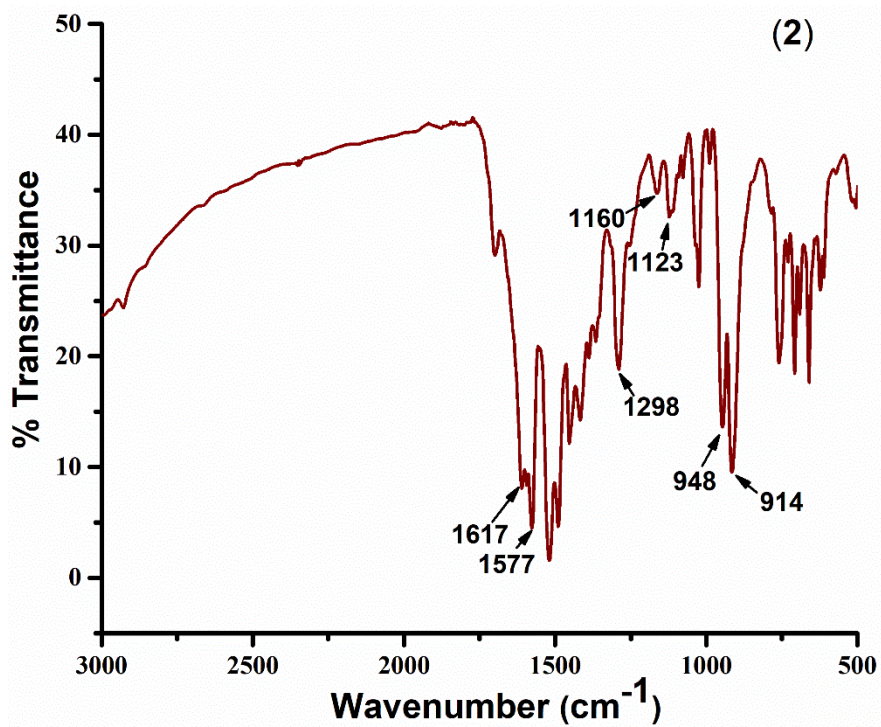

Fig. S7 IR spectrum of  $[Mo^{VI}O_2(H_2O)_3]btzh(mp)_3$  (2).

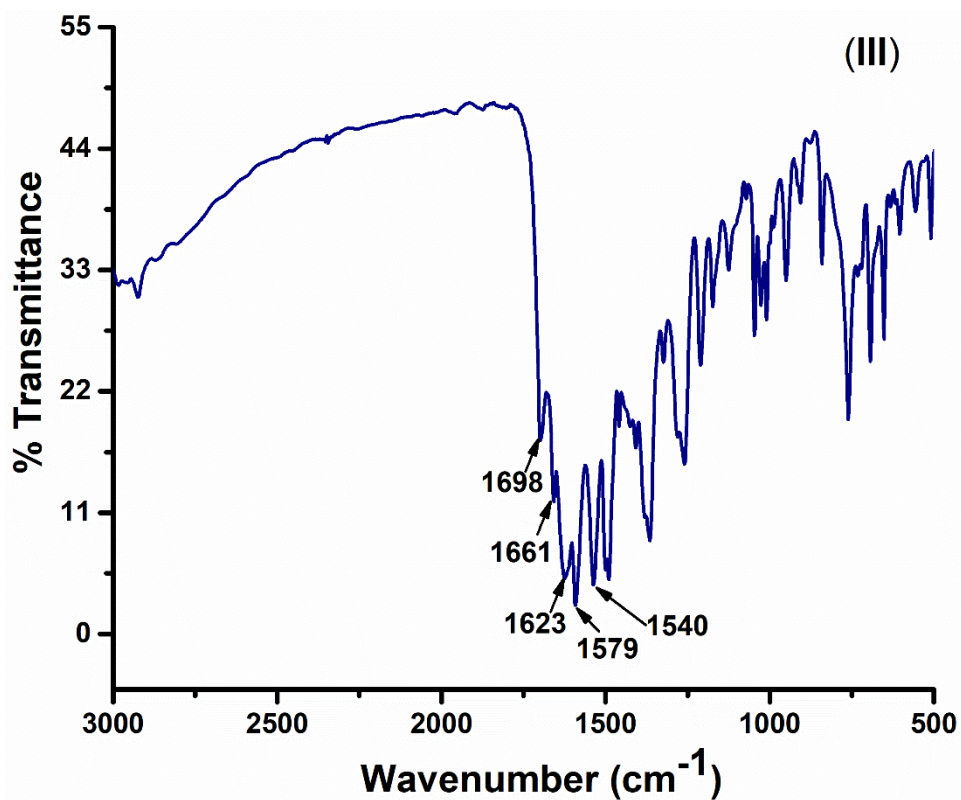

Fig. S8 IR spectrum of  $H_6btzh(ep)_3$  (III).

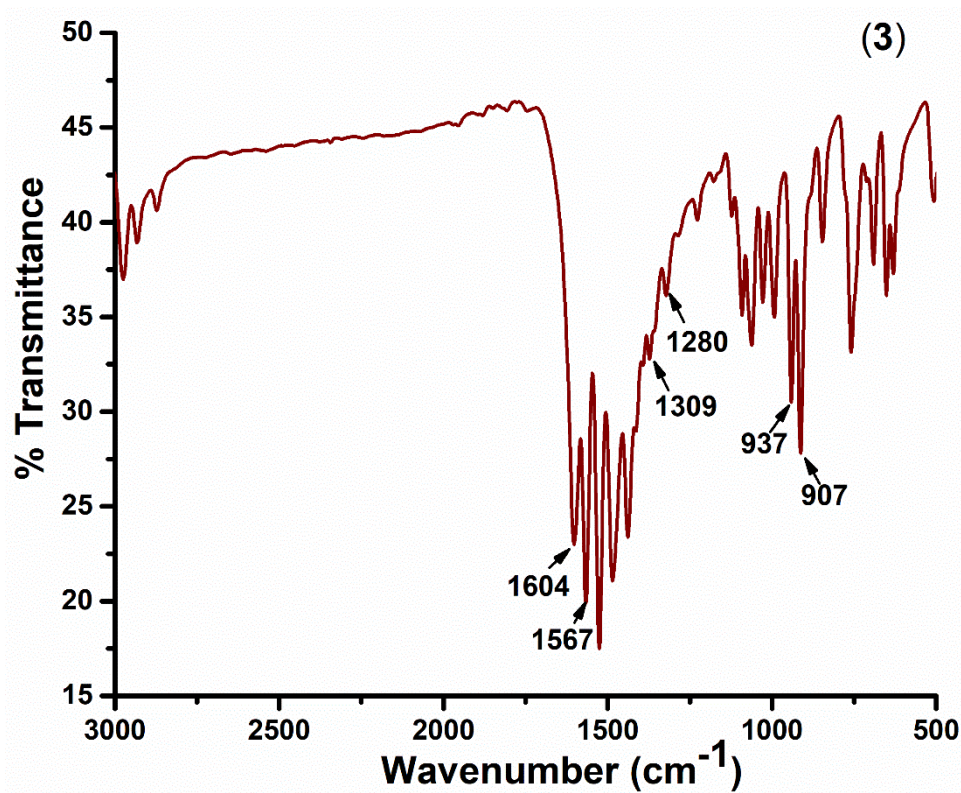

Fig. S9 IR spectrum of  $[Mo^{VI}O_2(H_2O)_3]btzh(ep)_3$  (3).



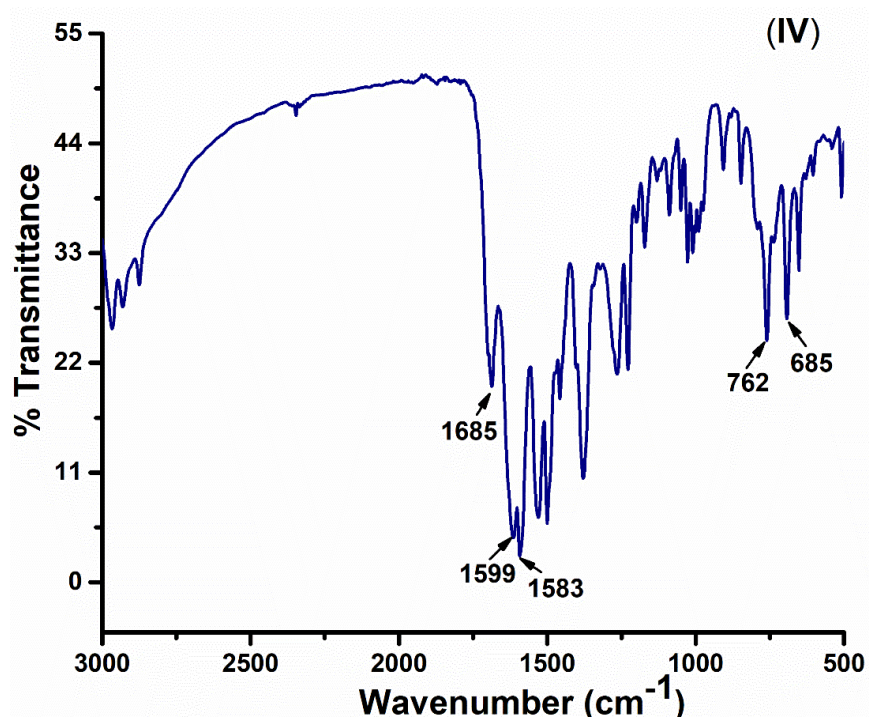

Fig. S10 IR spectrum of  $H_6btzh(pp)_3$  (IV).

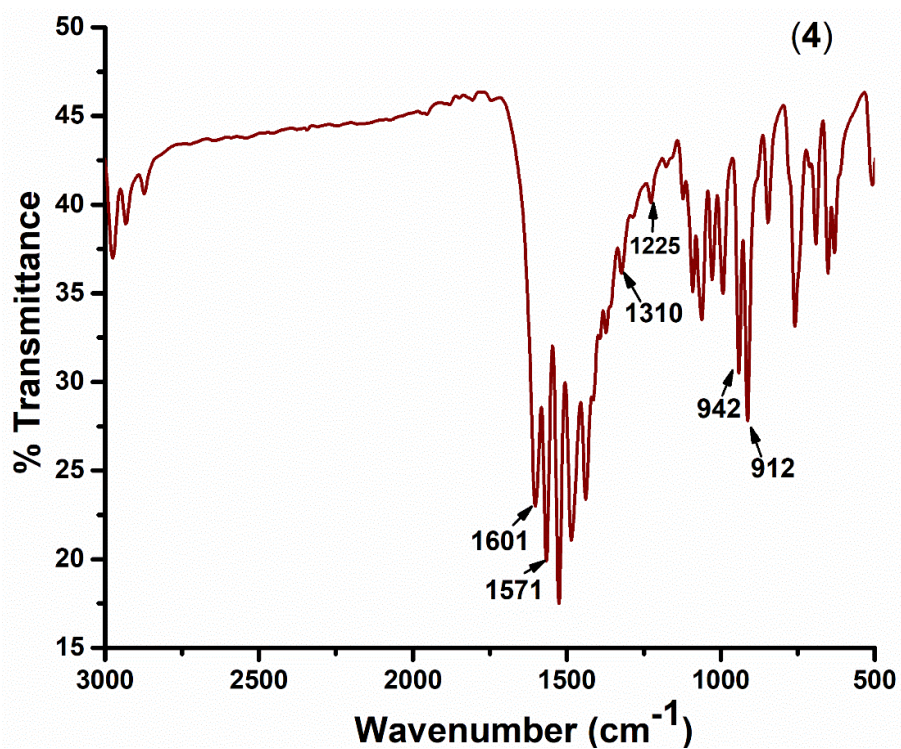

Fig. S11 IR spectrum of  $[Mo^{VI}O_2(H_2O)_3btzh(pp)_3]$  (4).

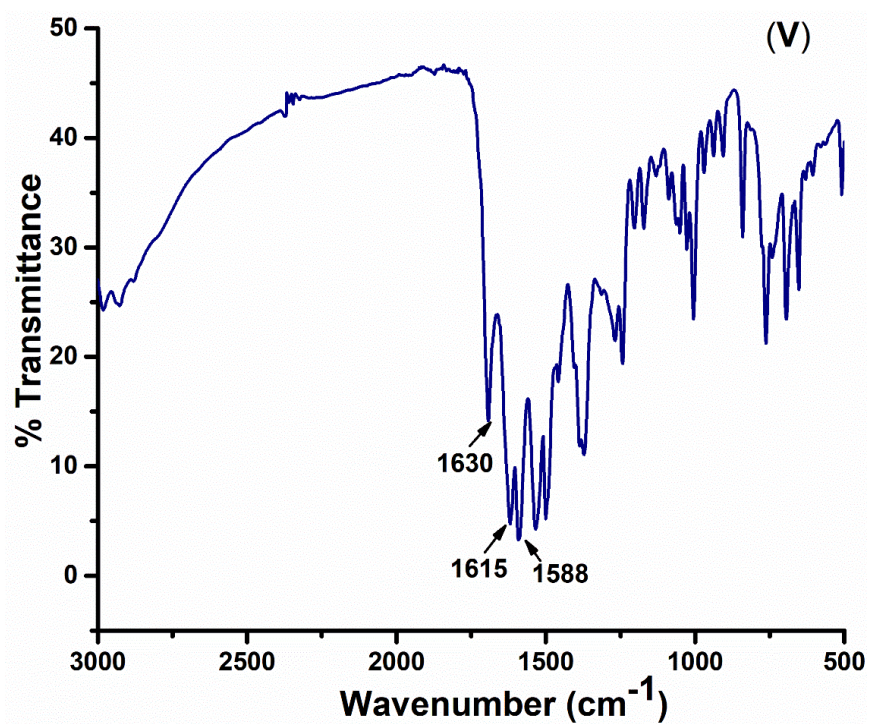

Fig. S12 IR spectrum of  $H_6btzh(php)_3$  (V).

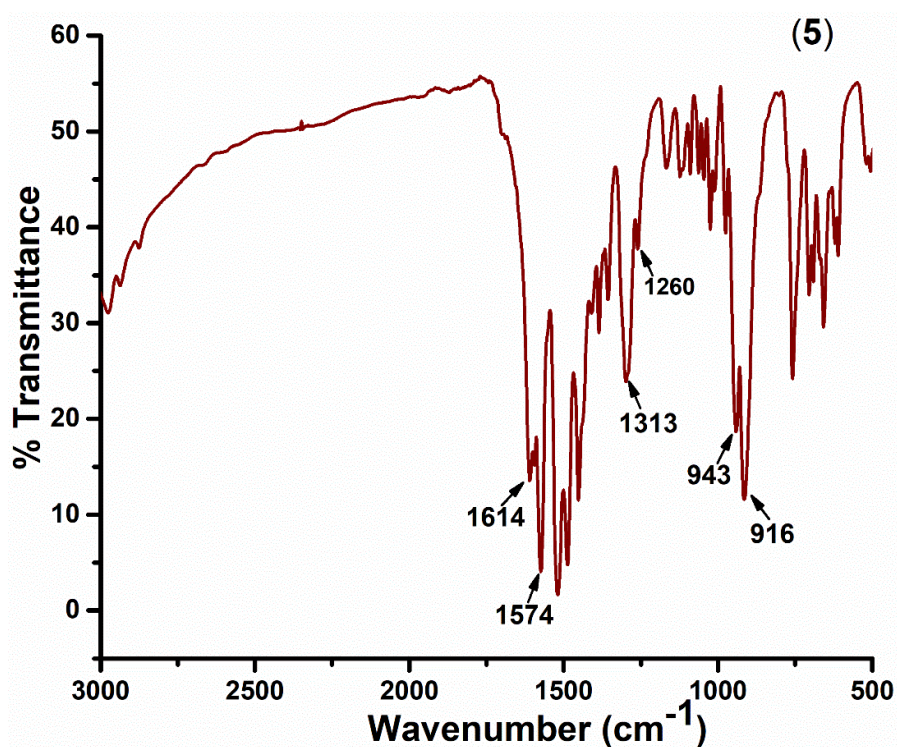

Fig. S13 IR spectrum of  $[Mo^{VI}O_2(H_2O)_3]btzh(php)_3$  (5).



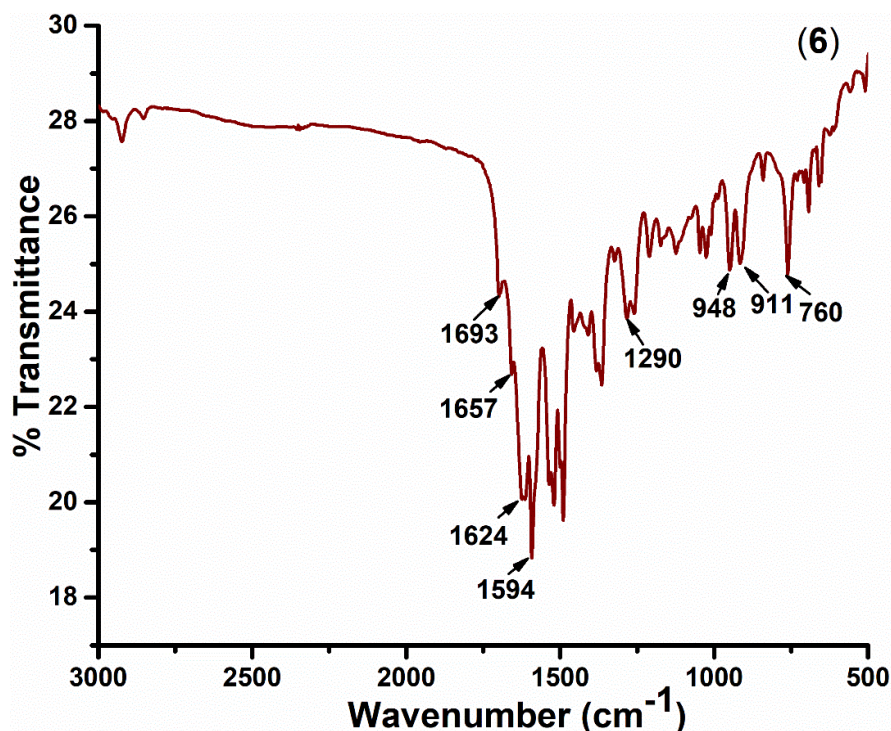

**Fig. S14** IR spectrum of mononuclear complex  $[\{\text{Mo}^{\text{VI}}\text{O}_2(\text{H}_2\text{O})\}\text{bthz}(\text{pp})_3]$  (**6**).

**Table S1** UV-visible spectral data of ligands and complexes.

| Compounds                                                                                           | $\lambda_{\text{max}}/\text{nm}$ ( $\epsilon/\text{M}^{-1}\text{cm}^{-1}$ )         |
|-----------------------------------------------------------------------------------------------------|-------------------------------------------------------------------------------------|
| $\text{H}_6\text{btzh}(\text{fp})_3$ ( <b>I</b> )                                                   | 262 ( $4.73 \times 10^2$ ), 297 ( $2.73 \times 10^2$ ), 410 ( $0.64 \times 10^2$ )  |
| $[\{\text{Mo}^{\text{VI}}\text{O}_2(\text{H}_2\text{O})\}_3\text{bthz}(\text{fp})_3]$ ( <b>1</b> )  | 262 ( $4.28 \times 10^3$ ), 328 ( $2.22 \times 10^3$ ), 417 ( $1.07 \times 10^3$ )  |
| $\text{H}_6\text{btzh}(\text{mp})_3$ ( <b>II</b> )                                                  | 258 ( $4.26 \times 10^2$ ), 304 ( $2.87 \times 10^2$ ), 373 ( $2.98 \times 10^2$ )  |
| $[\{\text{Mo}^{\text{VI}}\text{O}_2(\text{H}_2\text{O})\}_3\text{bthz}(\text{mp})_3]$ ( <b>2</b> )  | 258 ( $2.76 \times 10^3$ ), 334 ( $1.92 \times 10^3$ ), 420 ( $7.48 \times 10^2$ )  |
| $\text{H}_6\text{btzh}(\text{ep})_3$ ( <b>III</b> )                                                 | 259 ( $3.87 \times 10^2$ ), 286 ( $3.73 \times 10^2$ ), 370 ( $3.84 \times 10^2$ ), |
| $[\{\text{Mo}^{\text{VI}}\text{O}_2(\text{H}_2\text{O})\}_3\text{bthz}(\text{ep})_3]$ ( <b>3</b> )  | 259 ( $4.10 \times 10^3$ ), 328 ( $3.59 \times 10^3$ ), 418 ( $1.06 \times 10^3$ )  |
| $\text{H}_6\text{tzh}(\text{pp})_3$ ( <b>IV</b> )                                                   | 258 ( $4.32 \times 10^2$ ), 310 ( $2.75 \times 10^2$ ), 372 ( $0.59 \times 10^2$ )  |
| $[\{\text{Mo}^{\text{VI}}\text{O}_2(\text{H}_2\text{O})\}_3\text{bthz}(\text{pp})_3]$ ( <b>4</b> )  | 258 ( $3.56 \times 10^3$ ), 331 ( $3.19 \times 10^3$ ), 418 ( $1.10 \times 10^3$ )  |
| $\text{H}_6\text{tzh}(\text{php})_3$ ( <b>V</b> )                                                   | 258 ( $4.66 \times 10^2$ ), 297 ( $2.64 \times 10^2$ ), 411 ( $0.66 \times 10^2$ )  |
| $[\{\text{Mo}^{\text{VI}}\text{O}_2(\text{H}_2\text{O})\}_3\text{bthz}(\text{php})_3]$ ( <b>5</b> ) | 259 ( $3.12 \times 10^3$ ), 339 ( $2.64 \times 10^3$ ), 431 ( $1.25 \times 10^3$ )  |

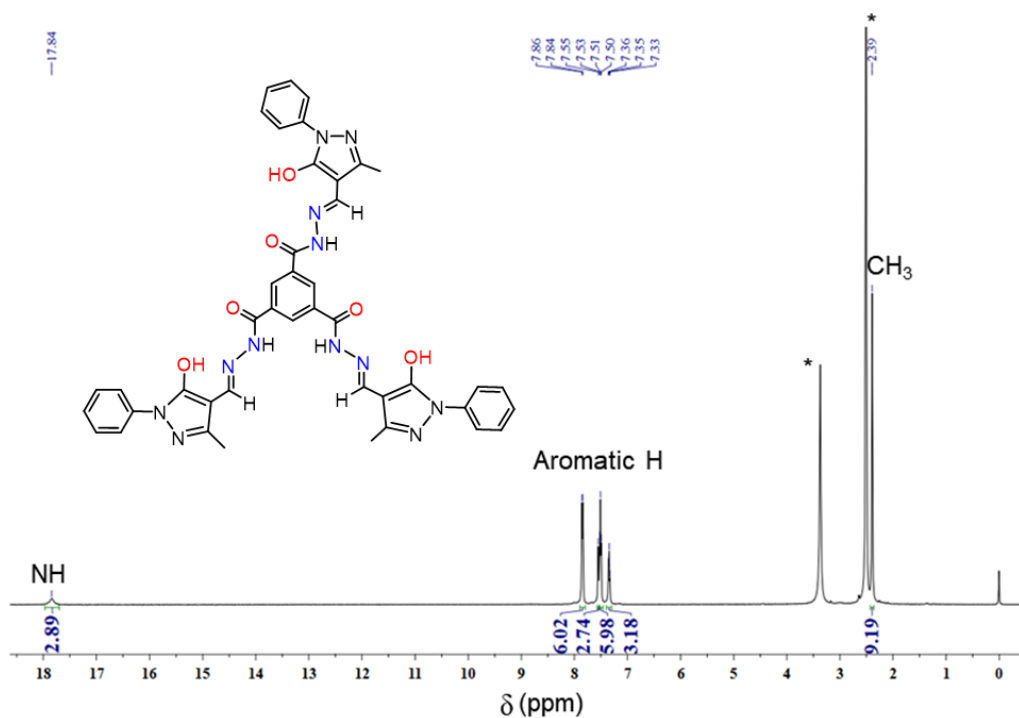

**Fig. S15**  $^1\text{H}$  NMR spectrum of ligand  $\text{H}_6\text{tzh}(\text{fp})_3$  (**I**) recorded in  $\text{DMSO-d}_6$ . \* indicates the proton impurity signal present in  $\text{DMSO-d}_6$  at  $\delta = 2.5$  ppm and that of moisture at  $\delta = 3.33$  ppm.

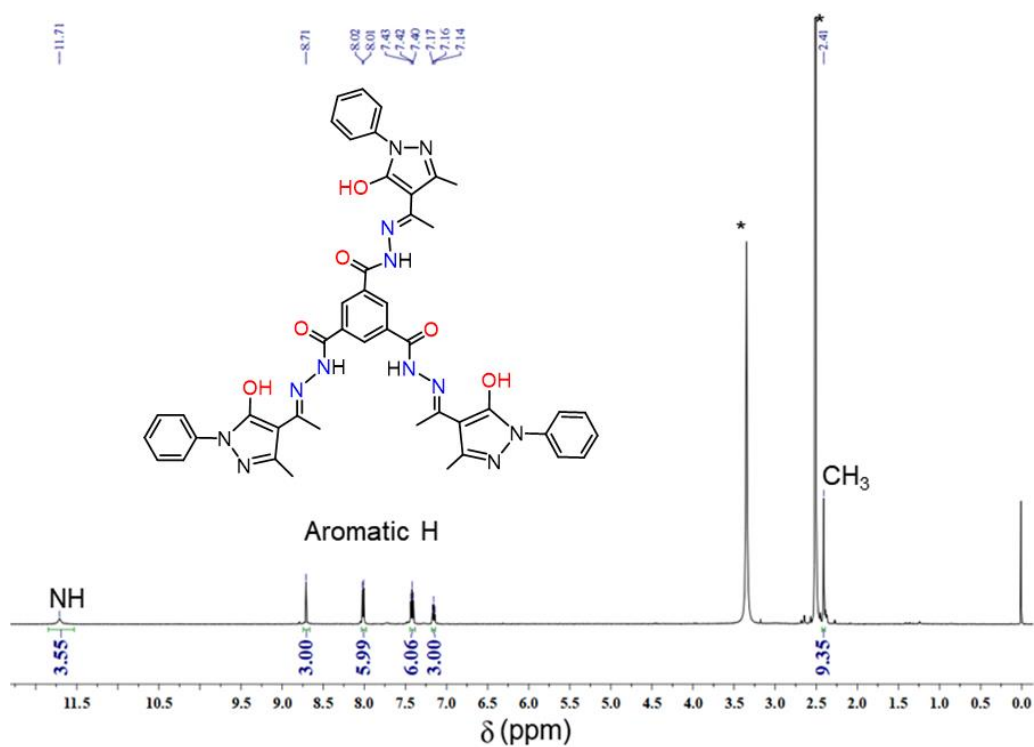

**Fig. S16**  $^1\text{H}$  NMR spectrum of ligand  $\text{H}_6\text{tzh}(\text{mp})_3$  (**II**) recorded in  $\text{DMSO-d}_6$ . \* indicates the proton impurity signal present in  $\text{DMSO-d}_6$  at  $\delta = 2.5$  ppm and that of moisture at  $\delta = 3.33$  ppm.

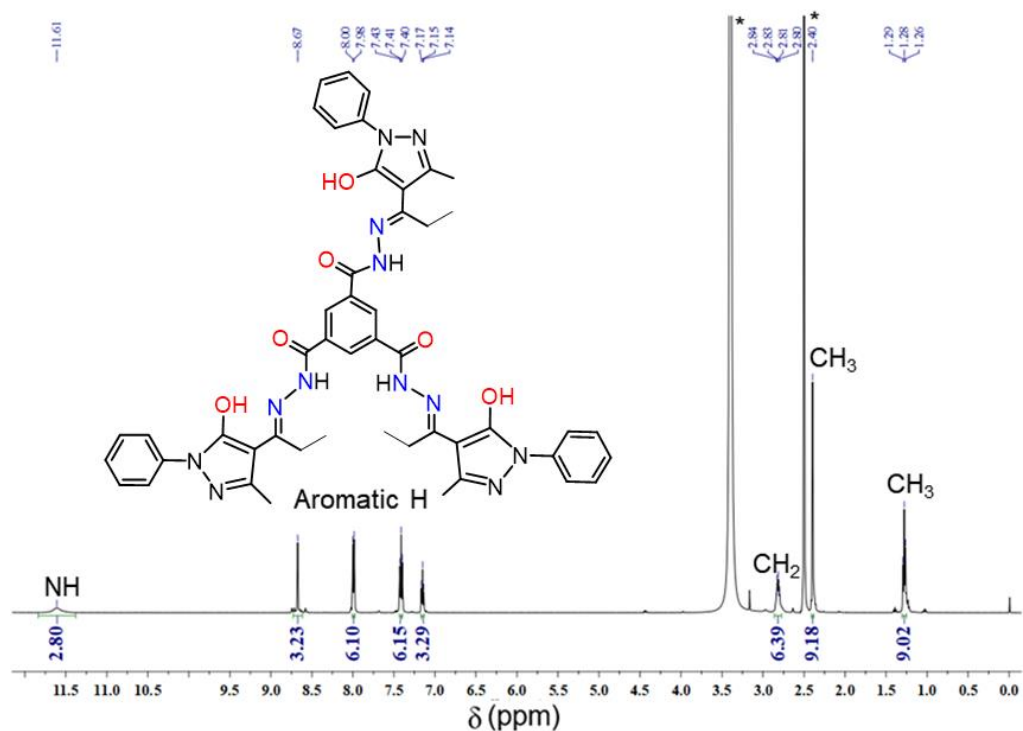

**Fig. S17**  $^1H$  NMR spectrum of ligand  $H_6tzh(ep)_3$  (**III**) recorded in  $DMSO-d_6$ . \* indicates the proton impurity signal present in  $DMSO-d_6$  at  $\delta = 2.5$  ppm and that of moisture at  $\delta = 3.33$  ppm.

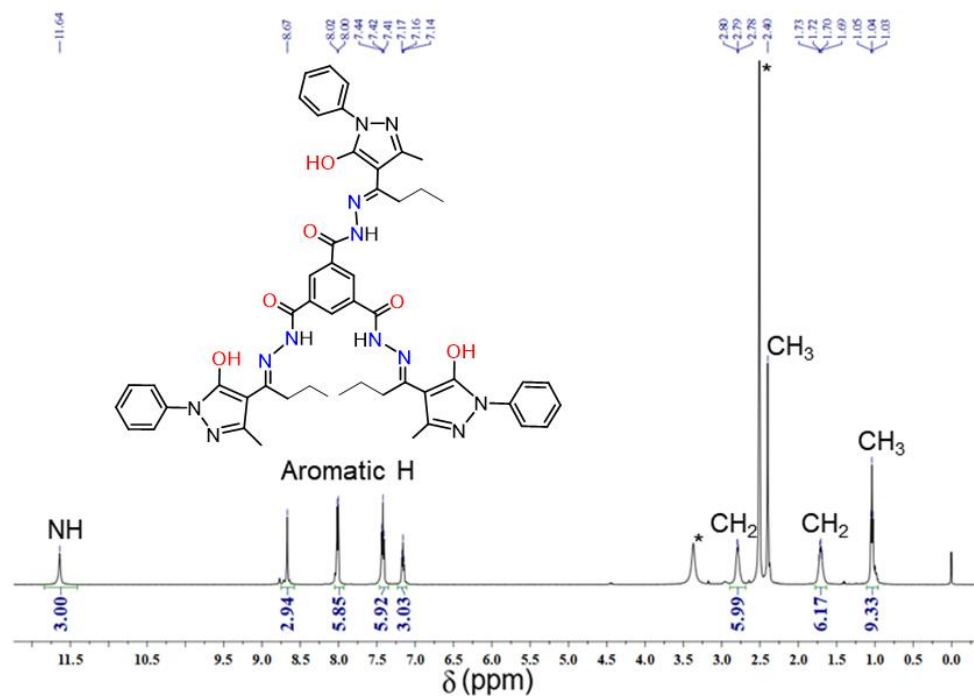

**Fig. S18**  $^1H$  NMR spectrum of ligand  $H_6tzh(pp)_3$  (**IV**) recorded in  $DMSO-d_6$ . \* indicates the proton impurity signal present in  $DMSO-d_6$  at  $\delta = 2.5$  ppm and that of moisture at  $\delta = 3.33$  ppm.



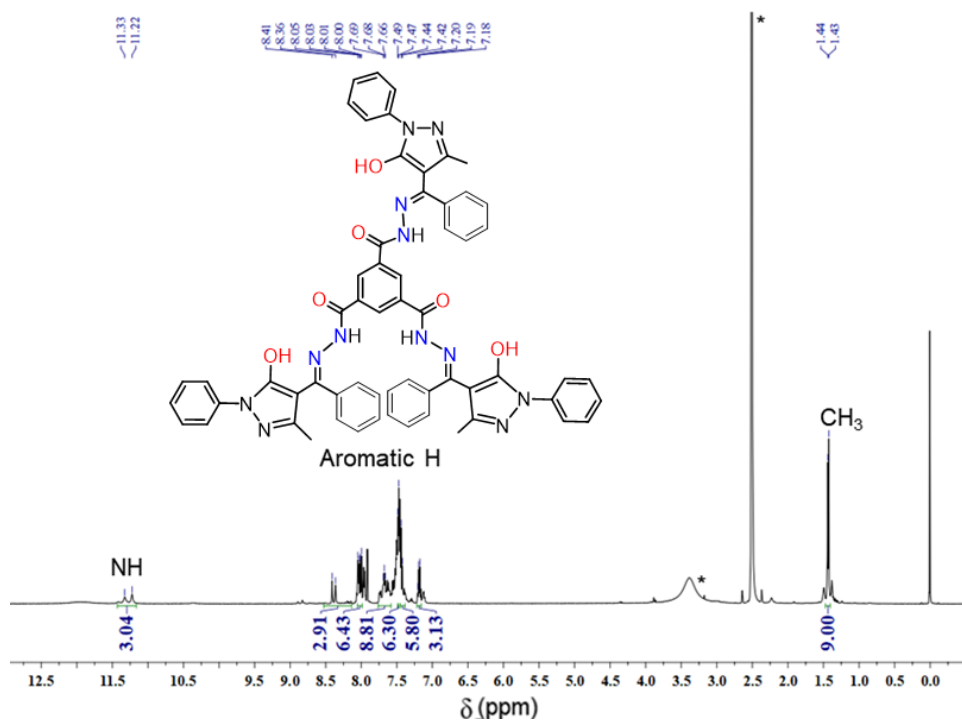

**Fig. S19**  $^1H$  NMR spectrum of ligand  $H_6tzh(php)_3$  (**V**) recorded in  $DMSO-d_6$ . \* indicates the proton impurity signal present in  $DMSO-d_6$  at  $\delta = 2.5$  ppm and that of moisture at  $\delta = 3.33$  ppm.

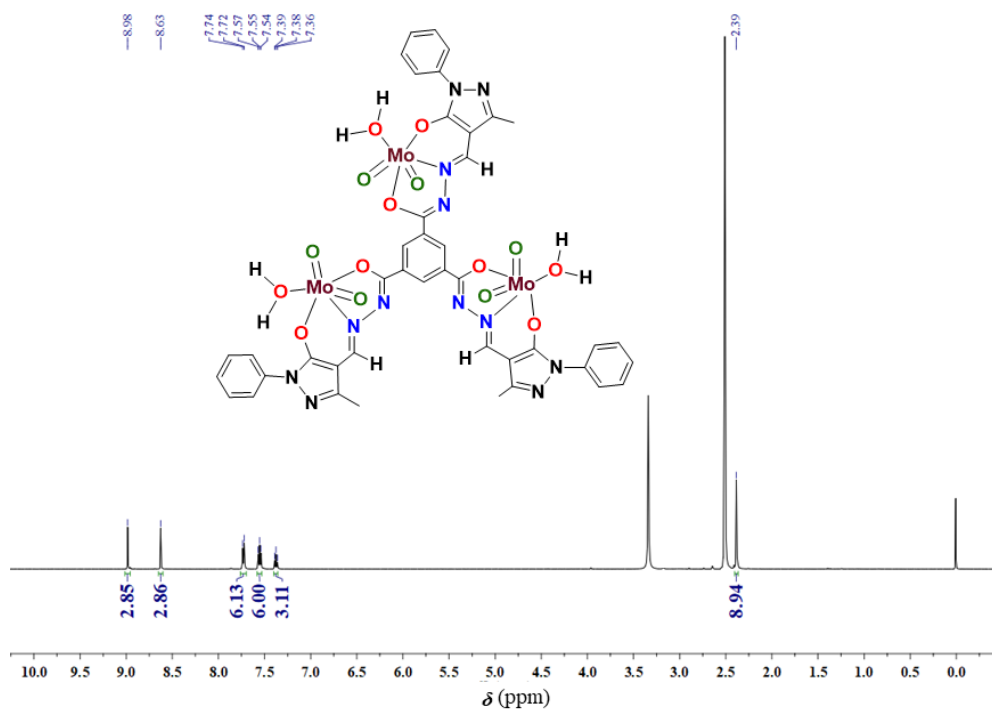

**Fig. S20.**  $^1H$  NMR spectrum of  $[Mo^{VI}O_2(H_2O)_3tzh(fp)_3]$  (**1**) recorded in  $DMSO-d_6$ .

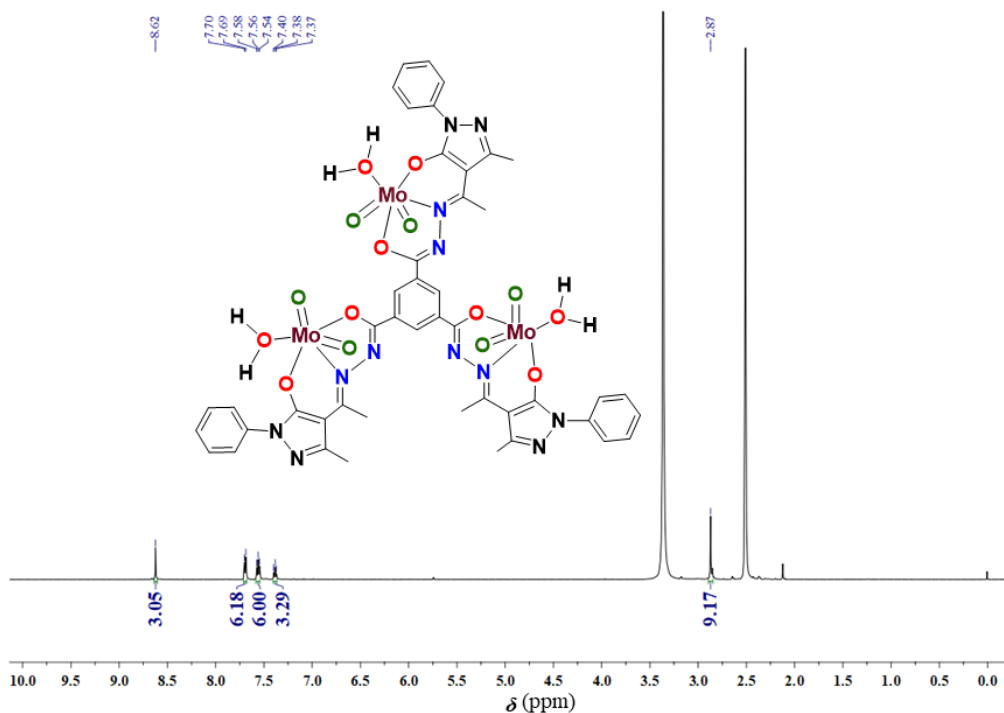

**Fig. 21** <sup>1</sup>H NMR spectrum of [Mo<sup>VI</sup>O<sub>2</sub>(H<sub>2</sub>O)]<sub>3</sub>thz(mp)<sub>3</sub> (**2**) recorded in DMSO-d<sub>6</sub>.

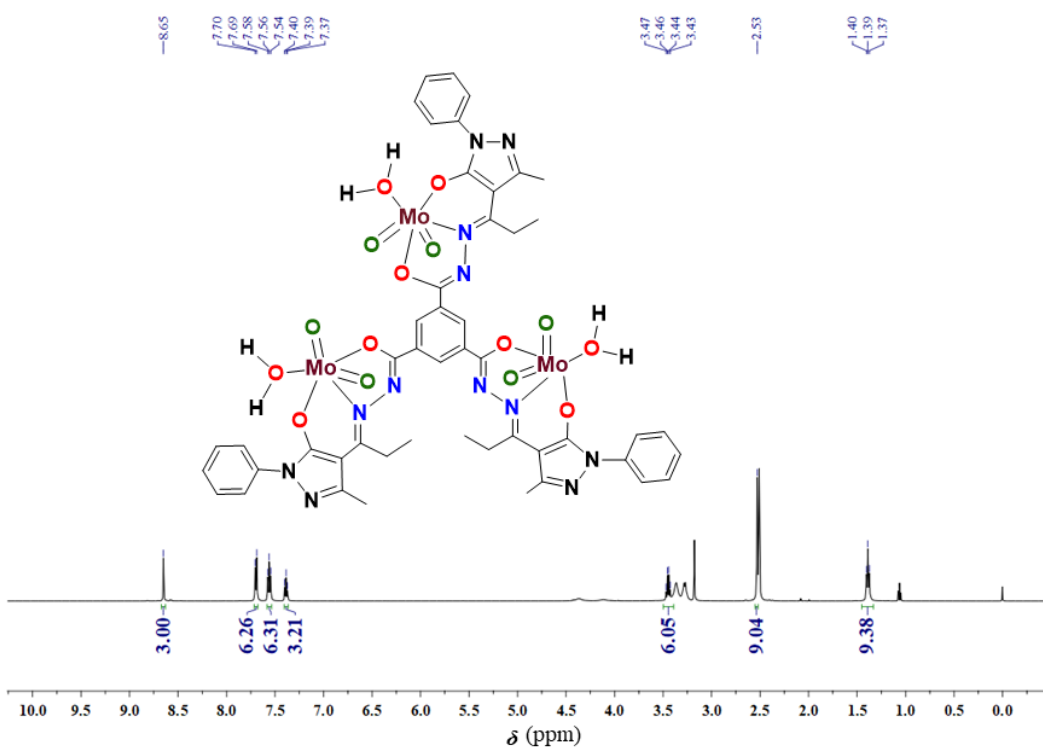

**Fig. 22** <sup>1</sup>H NMR spectrum of {Mo<sup>VI</sup>O<sub>2</sub>(H<sub>2</sub>O)}<sub>3</sub>thz(ep)<sub>3</sub> (**3**) recorded in DMSO-d<sub>6</sub>.

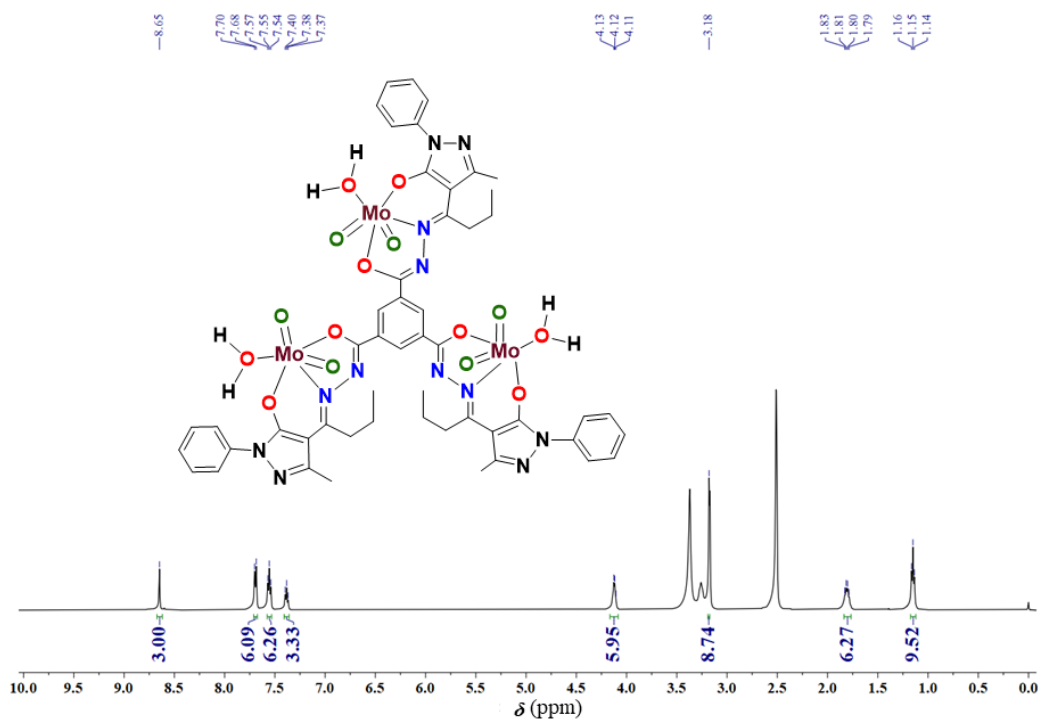

**Fig. 23**  $^1\text{H}$  NMR spectrum of  $[\{\text{Mo}^{\text{VI}}\text{O}_2(\text{H}_2\text{O})\}_3\text{thz}(\text{pp})_3]$  (**4**) recorded in  $\text{DMSO-d}_6$ .

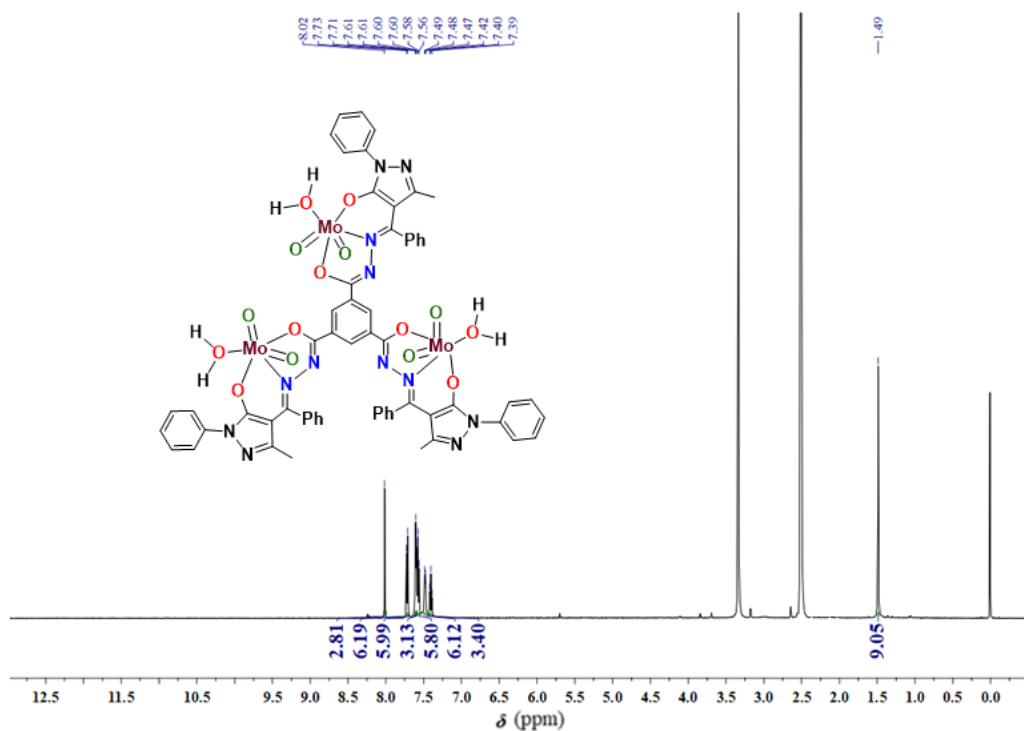

**Fig. 24**  $^1\text{H}$  NMR spectrum of  $[\{\text{Mo}^{\text{VI}}\text{O}_2(\text{H}_2\text{O})\}_3\text{thz}(\text{bp})_3]$  (**5**) recorded in  $\text{DMSO-d}_6$ .



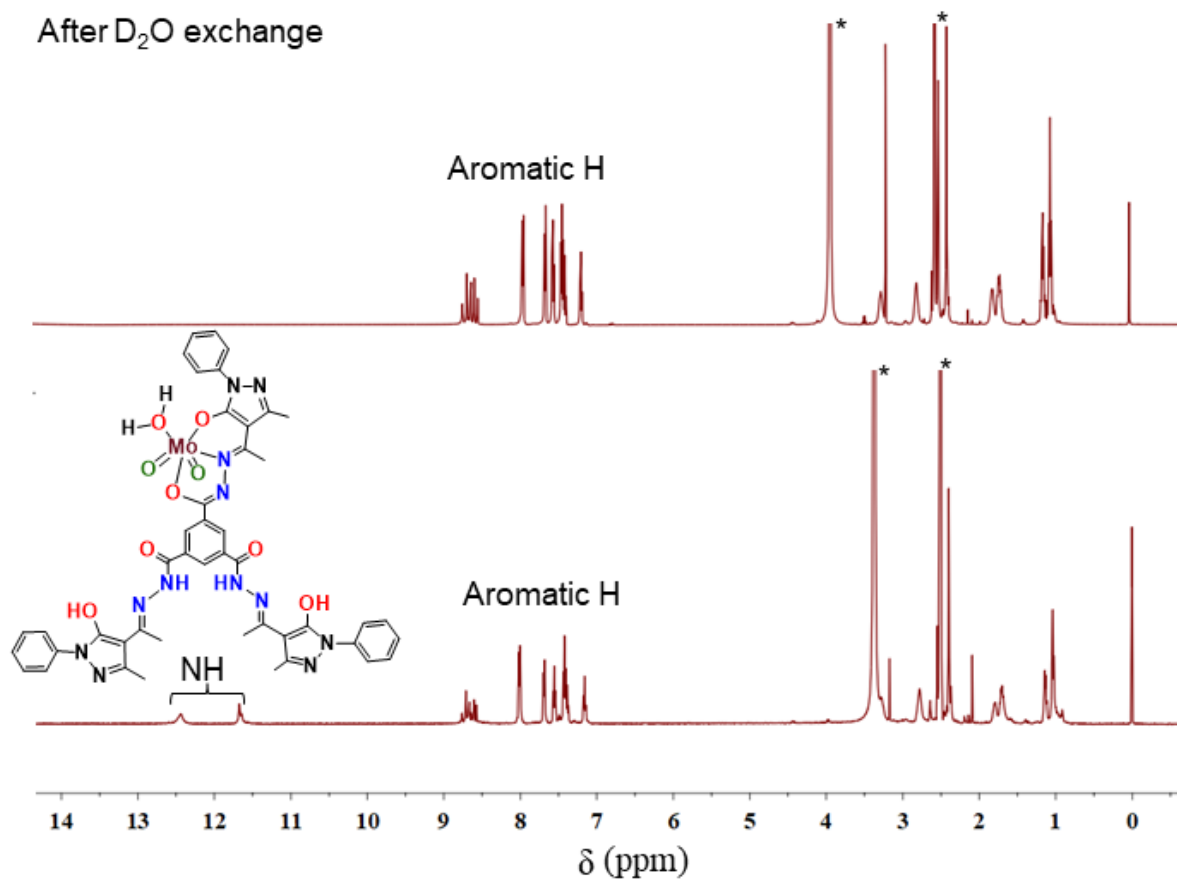

**Fig. 25** <sup>1</sup>H NMR spectrum of mononuclear complex **6** recorded in DMSO-d<sub>6</sub> before and after exchange with D<sub>2</sub>O.

**Table S2** Oxidation of 2-methylnaphthalene (0.71 g, 5 mmol) using  $[\{\text{Mo}^{\text{VI}}\text{O}_2(\text{H}_2\text{O})\}_3\text{bthz}(\text{fp})_3]$  (**1**) as a catalyst under different reaction conditions.

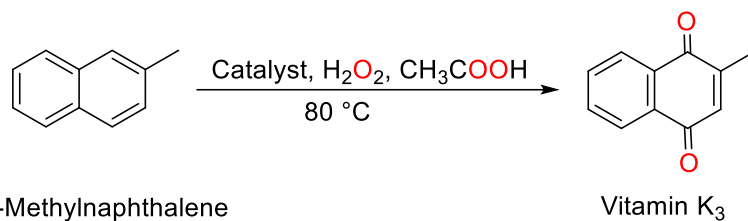

| S. No.               | Catalyst [mg (mmol)]             | CH <sub>3</sub> COOH (mL) | H <sub>2</sub> O <sub>2</sub> (mmol) | Solvent  | Temp.     | Time (h) | Conv. (%) | Selectivity (%) |
|----------------------|----------------------------------|---------------------------|--------------------------------------|----------|-----------|----------|-----------|-----------------|
| 1                    | 3.0 (2.4×10 <sup>-3</sup> )      | 2                         | 15                                   | -        | 80        | 2        | 14        | >99             |
| 2                    | 3.0 (2.4×10 <sup>-3</sup> )      | 2                         | 15                                   | -        | 80        | 3        | 23        | >99             |
| 2                    | 3.0 (2.4×10 <sup>-3</sup> )      | 2                         | 15                                   | -        | 80        | 4        | 30        | >99             |
| 3                    | 3.0 (2.4×10 <sup>-3</sup> )      | 2                         | 15                                   | -        | 80        | 5        | 49        | >99             |
| 4                    | 4.0 (3.2×10 <sup>-3</sup> )      | 2                         | 15                                   | -        | 80        | 5        | 61        | >99             |
| 5                    | 5.0 (4.0×10 <sup>-3</sup> )      | 2                         | 15                                   | -        | 80        | 5        | 70        | >99             |
| 6                    | 5.0 (4.0×10 <sup>-3</sup> )      | 1                         | 20                                   | -        | 80        | 5        | 62        | 87              |
| <b>7<sup>a</sup></b> | <b>5.0 (4.0×10<sup>-3</sup>)</b> | <b>2</b>                  | <b>20</b>                            | <b>-</b> | <b>80</b> | <b>5</b> | <b>81</b> | <b>&gt;99</b>   |
| 8                    | 5.0 (4.0×10 <sup>-3</sup> )      | 3                         | 20                                   | -        | 80        | 5        | 85        | >99             |
| 9                    | 5.0 (4.0×10 <sup>-3</sup> )      | 2                         | 25                                   | -        | 80        | 5        | 86        | >99             |
| 10                   | 5.0 (4.0×10 <sup>-3</sup> )      | 2                         | 20                                   | -        | 70        | 5        | 69        | >99             |
| 11                   | 5.0 (4.0×10 <sup>-3</sup> )      | 2                         | 20                                   | -        | 90        | 5        | 84        | >99             |
| 12                   | -                                | 2                         | 20                                   | -        | 80        | 5        | 51        | 71              |
| 13                   | -                                | 2                         | -                                    | -        | 80        | 5        | 12        | 63              |

<sup>a</sup>Optimized reaction conditions among the different sets of reactions carried out.

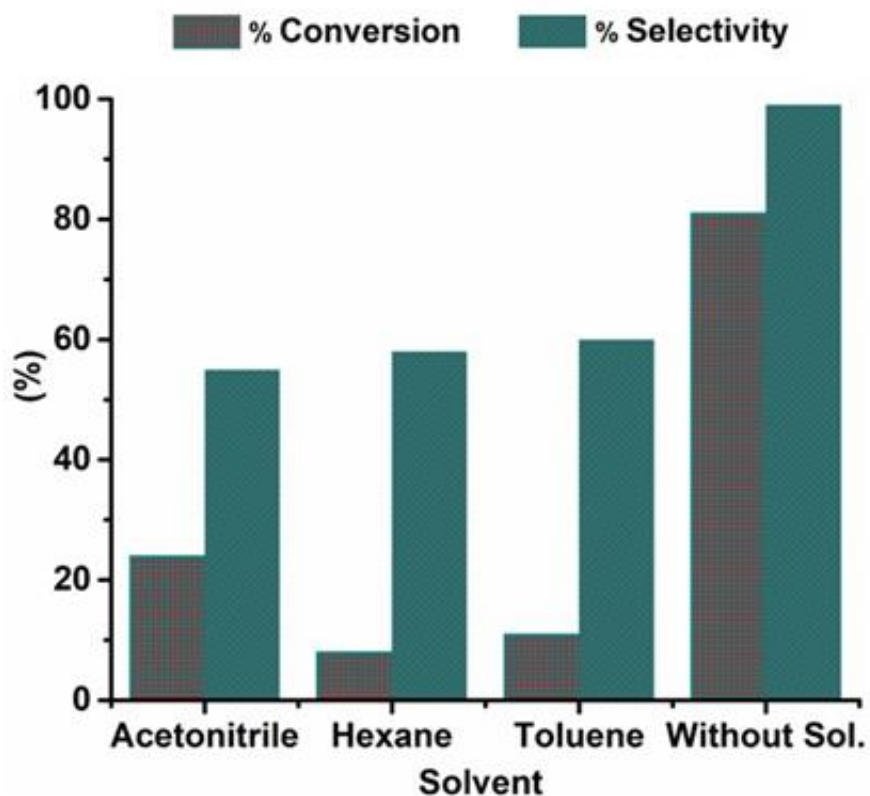

**Fig. S26** Effect of different solvents on the oxidation of 2-methylnaphthalene and selectivity of the formation of 2-methyl-1,4-naphthoquinone [Reaction conditions: catalyst (5.0 mg,  $4.0 \times 10^{-3}$  mmol), 2-methylnaphthalene (0.71 g, 5 mmol), 30% aqueous  $\text{H}_2\text{O}_2$  (2.31 g, 20 mmol) and  $\text{CH}_3\text{COOH}$  (2 mL) at 80 °C.



**Table S3** Oxidation of styrene (0.52 g, 5 mmol) using [ $\{\text{Mo}^{\text{VI}}\text{O}_2(\text{H}_2\text{O})\}_3\text{bthz}(\text{fp})_3$ ] (**1**) as a catalyst in 1.5 h reaction time under different reaction conditions.

| Entry                | Catalyst<br>(mg, mmol)          | H <sub>2</sub> O <sub>2</sub><br>(g, mmol) | NaHCO <sub>3</sub><br>(g, mmol) | MeCN/H <sub>2</sub> O<br>(V/V) | Temp.<br>(°C) | % Conv.   |
|----------------------|---------------------------------|--------------------------------------------|---------------------------------|--------------------------------|---------------|-----------|
| 1                    | 0.5, 4.0×10 <sup>-4</sup>       | 1.13, 10                                   | 0.168, 2                        | 2:2                            | 60            | 59        |
| 2                    | 1.0, 8.0×10 <sup>-4</sup>       | 1.13, 10                                   | 0.168, 2                        | 2:1                            | 60            | 79        |
| 3                    | 1.0, 8.0×10 <sup>-4</sup>       | 1.13, 10                                   | 0.168, 2                        | 4:3                            | 60            | 81        |
| 4                    | 1.0, 8.0×10 <sup>-4</sup>       | 1.13, 10                                   | 0.168, 2                        | 3:1                            | 60            | 77        |
| 5                    | 1.0, 8.0×10 <sup>-4</sup>       | 1.13, 10                                   | 0.168, 2                        | 5:0                            | 60            | 69        |
| 6                    | 1.0, 8.0×10 <sup>-4</sup>       | 1.13, 10                                   | 0.168, 2                        | 3:2                            | 50            | 71        |
| 7                    | 1.0, 8.0×10 <sup>-4</sup>       | 1.13, 10                                   | 0.126, 1.5                      | 3:2                            | 70            | 93        |
| <b>8<sup>a</sup></b> | <b>1.0, 8.0×10<sup>-4</sup></b> | <b>1.13, 10</b>                            | <b>0.168, 2</b>                 | <b>2:2</b>                     | <b>60</b>     | <b>88</b> |
| 9                    | 1.5, 1.2×10 <sup>-3</sup>       | 1.13, 10                                   | 0.168, 2                        | 2:2                            | 60            | 89        |
| 10                   | 1.0, 8.0×10 <sup>-4</sup>       | 0.565, 5                                   | 0.168, 2                        | 2:2                            | 60            | 62        |
| 11                   | 1.0, 8.0×10 <sup>-4</sup>       | 1.69, 15                                   | 0.168, 2                        | 2:2                            | 60            | 91        |
| 12                   | 1.0, 8.0×10 <sup>-4</sup>       | 1.13, 10                                   | 0.126, 1.5                      | 2:2                            | 60            | 76        |
| 13                   | 1.0, 8.0×10 <sup>-4</sup>       | 1.13, 10                                   | 0.126, 2.5                      | 2:2                            | 70            | 92        |
| 14                   | -                               | 1.13, 10                                   | 0.168, 2                        | 3:2                            | 60            | 44        |
| 15                   | -                               | 1.13, 10                                   | -                               | 3:2                            | 60            | 21        |
| 16                   | 1.0, 8.0×10 <sup>-4</sup>       | 1.13, 10                                   | -                               | 3:2                            | 60            | 31        |

<sup>a</sup> Optimized reaction conditions among the different sets of reactions carried out.

**Table S4** Oxidative bromination of thymol (1.50 g, 10 mmol) at room temperature using  $[\{\text{Mo}^{\text{VI}}\text{O}_2(\text{H}_2\text{O})\}_3\text{bthz}(\text{fp})_3]$  (**1**) as a catalyst under different reaction conditions.

| Sr. No.               | Catalyst mg (mmol)                  | KBr (mmol) | H <sub>2</sub> O <sub>2</sub> (mmol) | HClO <sub>4</sub> (mmol) | Time (min) | Conv. (%) | TOF (h <sup>-1</sup> ) | 2-Brth    | 4-Brth    | 2,4-Brth |
|-----------------------|-------------------------------------|------------|--------------------------------------|--------------------------|------------|-----------|------------------------|-----------|-----------|----------|
| 1.                    | 1.0 (8.00×10 <sup>-4</sup> )        | 10         | 10                                   | 10                       | 30         | 31        | 7948                   | 13        | 71        | 16       |
| 2.                    | 1.0 (8.00×10 <sup>-4</sup> )        | 10         | 10                                   | 10                       | 60         | 41        | 5256                   | 14        | 78        | 8        |
| 3.                    | 1.0 (8.00×10 <sup>-4</sup> )        | 10         | 15                                   | 10                       | 30         | 52        | 13332                  | 17        | 79        | 4        |
| 4.                    | 1.0 (8.00×10 <sup>-4</sup> )        | 10         | 15                                   | 10                       | 60         | 61        | 7820                   | 18        | 70        | 12       |
| 5.                    | 1.0 (8.00×10 <sup>-4</sup> )        | 15         | 10                                   | 15                       | 60         | 57        | 7307                   | 12        | 84        | 4        |
| 6.                    | 2.0 (1.60×10 <sup>-3</sup> )        | 10         | 10                                   | 10                       | 30         | 39        | 9999                   | 17        | 74        | 9        |
| 7.                    | 2.0 (1.60×10 <sup>-3</sup> )        | 10         | 10                                   | 10                       | 60         | 51        | 6538                   | 12        | 82        | 6        |
| 8.                    | 2.0 (1.60×10 <sup>-3</sup> )        | 10         | 10                                   | 20                       | 90         | 61        | 5215                   | 13        | 79        | 8        |
| 9                     | 2.0 (1.60×10 <sup>-3</sup> )        | 15         | 15                                   | 15                       | 30         | 63        | 16153                  | 12        | 85        | 3        |
| 10                    | 2.0 (1.60×10 <sup>-3</sup> )        | 15         | 15                                   | 15                       | 60         | 77        | 9871                   | 13        | 84        | 3        |
| 11                    | 2.0 (1.60×10 <sup>-3</sup> )        | 15         | 20                                   | 20                       | 30         | 81        | 20768                  | 12        | 80        | 8        |
| <b>12<sup>a</sup></b> | <b>2.0</b> (1.60×10 <sup>-3</sup> ) | <b>15</b>  | <b>20</b>                            | <b>20</b>                | <b>60</b>  | <b>98</b> | <b>12563</b>           | <b>13</b> | <b>81</b> | <b>6</b> |
| 13                    | 2.0 (1.60×10 <sup>-3</sup> )        | 20         | 20                                   | 20                       | 60         | 99        | 12691                  | 11        | 60        | 29       |
| 14                    | 3.0 (2.4×10 <sup>-3</sup> )         | 10         | 10                                   | 10                       | 60         | 57        | 2435                   | 17        | 75        | 8        |

<sup>a</sup>Optimized reaction conditions among the different sets of reactions carried out.

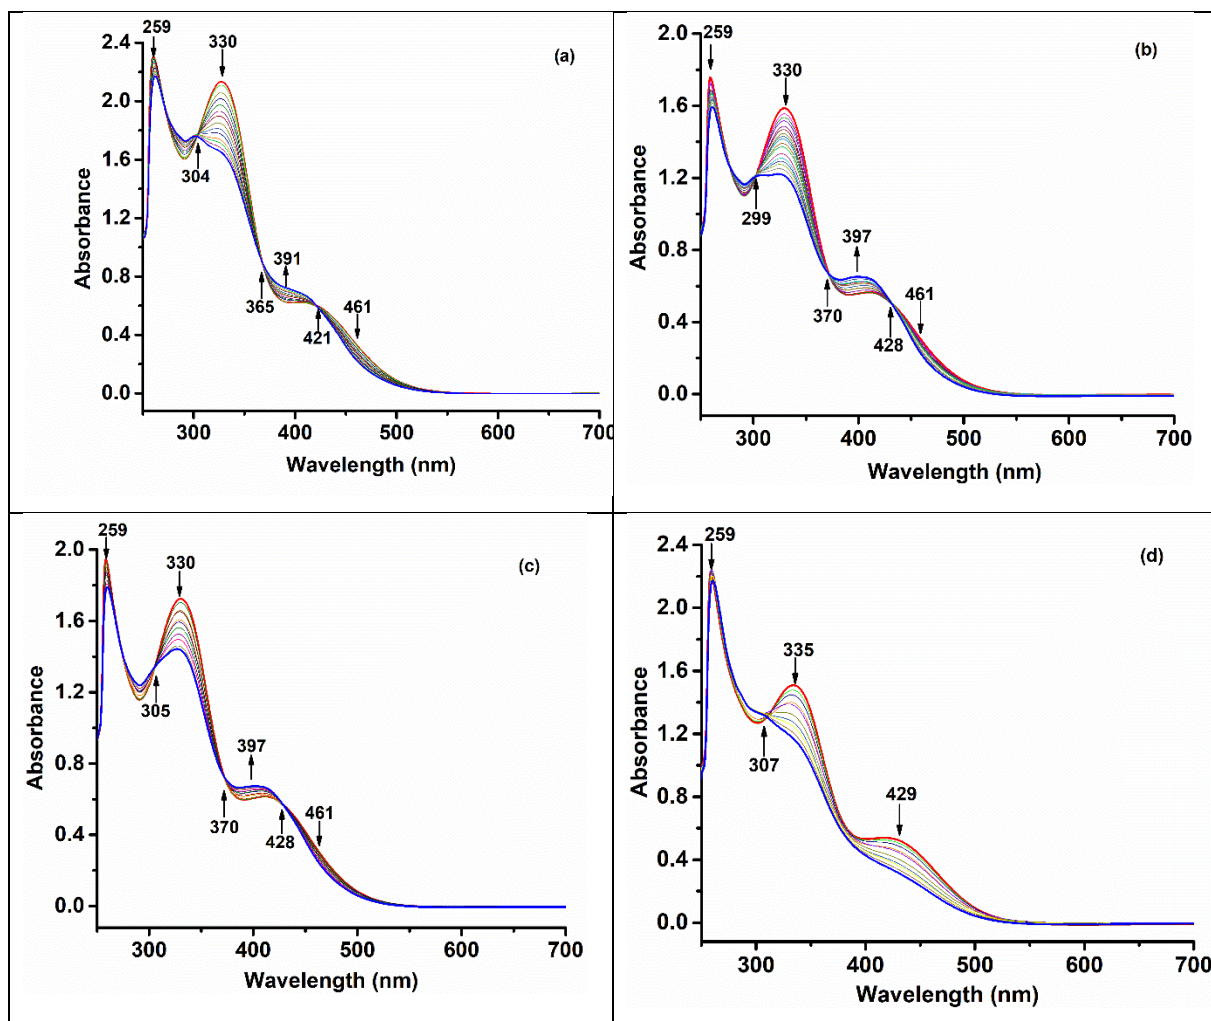

**Fig. S27** UV-Vis spectral changes obtained during the titration of complexes **2–5** with H<sub>2</sub>O<sub>2</sub>. (a) Spectra were recorded at every 2 min after the addition of one drop of 30% H<sub>2</sub>O<sub>2</sub> (0.830 g, 7.3 mmol) dissolved in 10 mL DMSO to a solution of **2** (0.001 g,  $7.81 \times 10^{-5}$  M) in 10 mL DMSO. (b) Spectra were recorded at every 2 min after the addition of one drop of 30% H<sub>2</sub>O<sub>2</sub> (0.830 g, 7.3 mmol) dissolved in 10 mL DMSO to a solution of **3** (0.001 g,  $7.57 \times 10^{-5}$  M) in 10 mL DMSO. (c) Spectra were recorded at every 2 min after the addition of one drop of 30% H<sub>2</sub>O<sub>2</sub> (0.830 g, 7.3 mmol) dissolved in 10 mL DMSO to a solution of **4** (0.001 g,  $7.33 \times 10^{-5}$  M) in 10 mL DMSO. (d) Spectra were recorded at every 2 min after the addition of one drop of 30% H<sub>2</sub>O<sub>2</sub> (0.830 g, 7.3 mmol) dissolved in 10 mL DMSO to a solution of **5** (0.001 g,  $6.82 \times 10^{-5}$  M) in 10 mL DMSO.



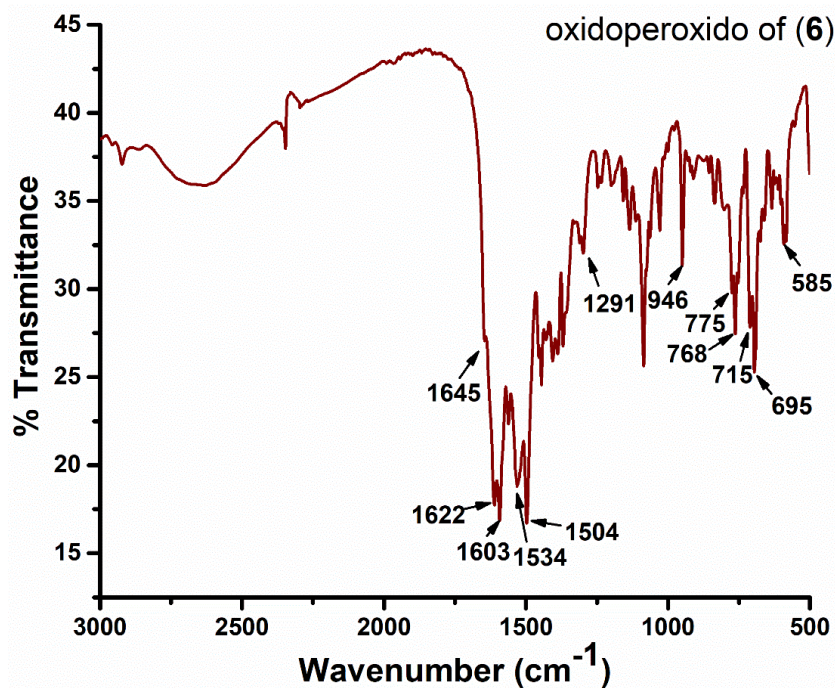

**Fig. S28** IR spectrum of oxidoperoxido complex of **6** isolated after stirring **6** with H<sub>2</sub>O<sub>2</sub> in MeOH.

### Energy table for the molecules in the catalytic cycle

All DFT computations were performed using the ORCA 4.2.1<sup>[1]</sup> quantum chemical program package. Geometries were optimized along the reaction profile diagram with the GGA (generalized gradient approximation) density functional BP86<sup>[2,3]</sup> in conjunction with the split valence basis sets def2-SVP<sup>[4]</sup>. The RI<sup>[5-7]</sup> (resolution-of-identity) approximation was applied to accelerate the overall calculations. Becke-Johnson (D3BJ) damping<sup>[8]</sup> was used to account for the noncovalent interactions by using atom-pairwise dispersion corrections. single point calculations were carried out with BP86/def2-TZVP<sup>[3]</sup> method to calculate Gibbs free energies on the BP86/def2-SVP geometries.

| Molecule                           | E <sub>tot</sub> [a.u] | G <sub>298</sub> [a.u] |
|------------------------------------|------------------------|------------------------|
| <b>1'</b>                          | -3850.788928           | -3849.979133           |
| <b>1'a</b>                         | -4114.1507270          | -4113.33700            |
| <b>1'b</b>                         | -4114.1487847          | -4113.331751           |
| <b>1'c</b>                         | -3925.972891           | -3925.159704           |
| <b>2'a</b>                         | -4078.68768            | -4077.84274            |
| <b>2'b</b>                         | -4078.679905           | -4077.831577           |
| <b>2'c</b>                         | -4351.402763           | -4350.425618           |
| <b>3'a</b>                         | -6424.515701           | -6423.716332           |
| <b>HCO<sub>3</sub><sup>-</sup></b> | -264.5917988           | -264.592210            |
| <b>HCO<sub>4</sub><sup>-</sup></b> | -339.7866902           | -339.785643            |

|                                   |              |              |
|-----------------------------------|--------------|--------------|
| <b>Styrene peroxide</b>           | -385.016789  | -384.913900  |
| <b>Styrene</b>                    | -309.7767579 | -309.677908  |
| <b>CH<sub>3</sub>COOOH</b>        | -304.3631954 | -304.330059  |
| <b>CH<sub>3</sub>COOH</b>         | -229.1996011 | -229.166645  |
| <b>Naphthalene</b>                | -425.3896532 | -425.253043  |
| <b>Phenol</b>                     | -307.608288  | -307.535466  |
| <b>o-Bromophenol</b>              | -2881.448991 | 2881.388836  |
| <b>HBr</b>                        | -2574.816593 | -2574.829980 |
| <b>H<sub>2</sub>O<sub>2</sub></b> | -151.629918  | -151.626874  |
| <b>H<sub>2</sub>O</b>             | -76.46495919 | -76.462013   |
| <b>HOBr</b>                       | -2650.2472   | -2650.259187 |

---

### XYZ coordinates of the molecules present in the catalytic cycle

1'

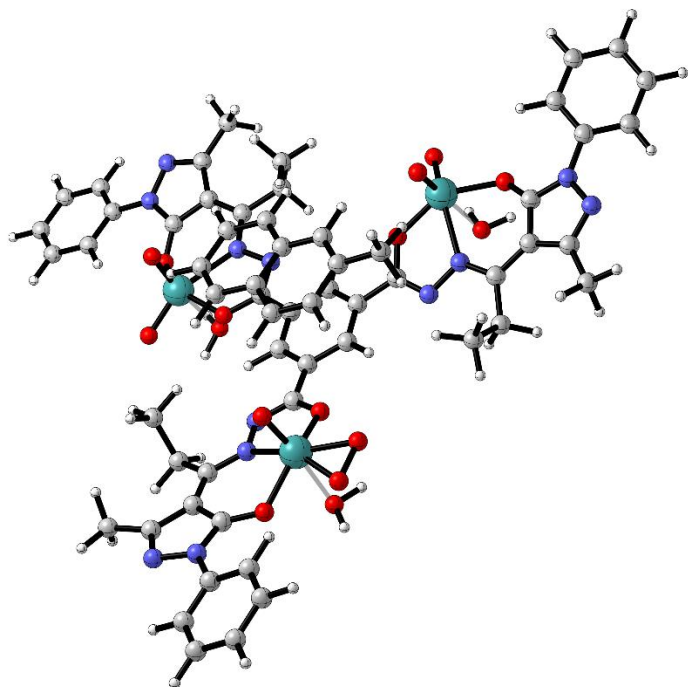

|    |               |             |              |
|----|---------------|-------------|--------------|
| O  | -8.696218494  | 9.014075113 | 12.959080343 |
| H  | -8.104825702  | 9.249313284 | 13.704353067 |
| H  | -8.195237337  | 8.323351402 | 12.477594733 |
| Mo | -10.232718150 | 7.533055994 | 14.247434679 |
| O  | -11.346821939 | 6.418711343 | 14.887886666 |
| N  | -12.181384986 | 9.225184692 | 12.507218238 |
| O  | -8.963340329  | 7.736372063 | 15.388294879 |
| N  | -11.486903754 | 8.049217189 | 12.397285465 |
| O  | -11.092732078 | 9.288124510 | 14.542802894 |

|    |               |              |              |
|----|---------------|--------------|--------------|
| N  | -10.199549823 | 4.072698122  | 10.389026490 |
| O  | -9.315707550  | 6.343344952  | 12.927168847 |
| N  | -9.446810346  | 4.492238883  | 11.463767460 |
| C  | -11.949544419 | 9.803725774  | 13.658302490 |
| C  | -11.733479830 | 7.307056311  | 11.317435660 |
| C  | -9.899277844  | 5.695179482  | 11.943056034 |
| C  | -11.006206507 | 6.080663076  | 11.141257693 |
| C  | -11.127019620 | 5.003112112  | 10.180840660 |
| C  | -8.336450769  | 3.711664434  | 11.890457970 |
| C  | -7.765582552  | 3.884584110  | 13.168513097 |
| H  | -8.178165558  | 4.621368267  | 13.866928765 |
| C  | -6.665801983  | 3.096384333  | 13.538695583 |
| H  | -6.223090239  | 3.233926507  | 14.536674977 |
| C  | -6.138531696  | 2.137196607  | 12.658964961 |
| H  | -5.274570958  | 1.525194388  | 12.958455982 |
| C  | -6.726100948  | 1.962920200  | 11.394133726 |
| H  | -6.326250637  | 1.210314332  | 10.697346298 |
| C  | -7.820411427  | 2.744786615  | 11.003121665 |
| H  | -8.298447140  | 2.623795845  | 10.022742132 |
| C  | -12.115451672 | 4.794620242  | 9.075116409  |
| H  | -11.985708141 | 5.534042134  | 8.257716754  |
| H  | -11.964271951 | 3.784325570  | 8.651391297  |
| H  | -13.160414787 | 4.876035035  | 9.434680549  |
| C  | -12.793219524 | 7.745947213  | 10.337437571 |
| H  | -12.716738011 | 8.845472174  | 10.232369060 |
| H  | -12.595533432 | 7.292367748  | 9.349788805  |
| C  | -14.209619844 | 7.388239904  | 10.827418054 |
| H  | -14.326185512 | 6.295746853  | 10.975857803 |
| H  | -14.419469447 | 7.887620501  | 11.792868121 |
| C  | -12.624862878 | 11.059803107 | 14.026982636 |
| C  | -12.323913844 | 11.678498573 | 15.252226677 |
| H  | -11.590691667 | 11.225550950 | 15.932533911 |
| O  | -15.090873688 | 14.741335779 | 9.444406497  |
| H  | -14.756964493 | 14.083705195 | 8.798704195  |
| H  | -15.599589323 | 15.368493669 | 8.890040846  |
| Mo | -16.974099577 | 13.345715059 | 10.298730411 |
| C  | -12.968036844 | 12.883418713 | 15.610911681 |
| C  | -13.909331556 | 13.463012292 | 14.743551675 |
| H  | -14.412269984 | 14.397836284 | 15.022046513 |

|   |               |              |              |
|---|---------------|--------------|--------------|
| C | -14.217149610 | 12.836136852 | 13.515441857 |
| C | -13.576472014 | 11.637993723 | 13.157081212 |
| H | -13.816136271 | 11.147738943 | 12.204787842 |
| O | -18.358902684 | 12.618533988 | 10.966242758 |
| N | -15.795615306 | 14.568527743 | 12.905781297 |
| O | -16.496938051 | 12.430325780 | 8.924759702  |
| N | -16.734180828 | 14.904268964 | 11.966133469 |
| O | -15.514639720 | 12.759538133 | 11.497613566 |
| N | -20.143042313 | 17.448827700 | 10.119910612 |
| O | -17.837519856 | 14.896544977 | 9.379654004  |
| N | -19.591954202 | 16.477045766 | 9.313768691  |
| C | -15.220081238 | 13.429520937 | 12.614281305 |
| C | -17.469974908 | 15.987396282 | 12.217422711 |
| C | -18.570098989 | 15.824724203 | 9.954941649  |
| C | -18.450367637 | 16.395662172 | 11.249686775 |
| C | -19.477102290 | 17.417112228 | 11.271220923 |
| C | -20.080972769 | 16.300931206 | 7.989550627  |
| C | -19.850424188 | 15.106302503 | 7.276334673  |
| H | -19.294539448 | 14.281500229 | 7.736324172  |
| C | -20.351310141 | 14.981657817 | 5.971834861  |
| H | -20.170881146 | 14.047584710 | 5.418229126  |
| C | -21.083192869 | 16.023274989 | 5.378333519  |
| H | -21.473441949 | 15.914145456 | 4.355744520  |
| C | -21.318372029 | 17.203581277 | 6.104644626  |
| H | -21.894956525 | 18.025678578 | 5.653589496  |
| C | -20.820473668 | 17.349959239 | 7.405677766  |
| H | -20.996852133 | 18.259066950 | 7.994998373  |
| C | -19.885903108 | 18.360121008 | 12.360429748 |
| H | -19.099776594 | 19.113152266 | 12.574394672 |
| H | -20.799091105 | 18.896036863 | 12.040763686 |
| H | -20.103037987 | 17.827110286 | 13.307457645 |
| C | -17.292698832 | 16.722279557 | 13.523132710 |
| H | -16.210486334 | 16.737162834 | 13.755707332 |
| H | -17.635836281 | 17.765648467 | 13.411810061 |
| C | -18.041547560 | 16.026044905 | 14.676034395 |
| H | -19.130975098 | 15.960565191 | 14.477298213 |
| H | -17.658026880 | 14.997326152 | 14.817497130 |
| O | -11.075759750 | 16.413563838 | 17.778538423 |
| H | -11.497781854 | 17.205286833 | 17.384019095 |

|    |               |              |              |
|----|---------------|--------------|--------------|
| H  | -10.599356390 | 16.770477270 | 18.556401393 |
| Mo | -13.118695961 | 15.560281716 | 18.931258889 |
| O  | -14.348053688 | 14.849129548 | 19.866919461 |
| N  | -11.821114335 | 12.992163373 | 17.742411425 |
| O  | -13.653114200 | 17.115267113 | 18.429414357 |
| N  | -11.748028911 | 13.720040393 | 18.900713228 |
| O  | -13.300704909 | 14.671561381 | 17.174631323 |
| N  | -10.413164665 | 14.625720687 | 23.245806382 |
| O  | -11.866082956 | 16.092987238 | 20.396192676 |
| N  | -11.024811608 | 15.655579484 | 22.564596218 |
| C  | -12.668975623 | 13.528145461 | 16.901048077 |
| C  | -11.014890812 | 13.202847429 | 19.887366896 |
| C  | -11.324755206 | 15.281881803 | 21.278659615 |
| C  | -10.886900088 | 13.941416640 | 21.112667008 |
| C  | -10.318372116 | 13.603659988 | 22.400756353 |
| C  | -11.242182244 | 16.897242215 | 23.226701798 |
| C  | -12.045530516 | 17.908661297 | 22.658503738 |
| H  | -12.525839113 | 17.757672573 | 21.686238154 |
| C  | -12.228392244 | 19.111455261 | 23.357625063 |
| H  | -12.857469288 | 19.896574440 | 22.911156892 |
| C  | -11.629272883 | 19.316520820 | 24.610610910 |
| H  | -11.782349678 | 20.262472664 | 25.151467646 |
| C  | -10.837375337 | 18.299014172 | 25.170113217 |
| H  | -10.366823766 | 18.442241961 | 26.154390937 |
| C  | -10.639048245 | 17.092529119 | 24.486805907 |
| H  | -10.031939075 | 16.281081546 | 24.907520889 |
| C  | -9.703968744  | 12.326834713 | 22.886424866 |
| H  | -8.743850547  | 12.108194258 | 22.374907938 |
| H  | -9.500484977  | 12.421230009 | 23.969370957 |
| H  | -10.373977703 | 11.459147971 | 22.723899516 |
| C  | -10.384390099 | 11.843634521 | 19.713278431 |
| H  | -9.993645207  | 11.787335994 | 18.678834067 |
| H  | -9.531592624  | 11.739293730 | 20.407068412 |
| C  | -11.402528226 | 10.706733530 | 19.923760363 |
| H  | -11.843870481 | 10.736824609 | 20.940030051 |
| H  | -12.226351685 | 10.789219262 | 19.188936092 |
| H  | -10.914503260 | 9.721142965  | 19.787907479 |
| H  | -14.969371343 | 7.723110025  | 10.093732929 |
| H  | -17.894204290 | 16.582268346 | 15.623100286 |



1'a

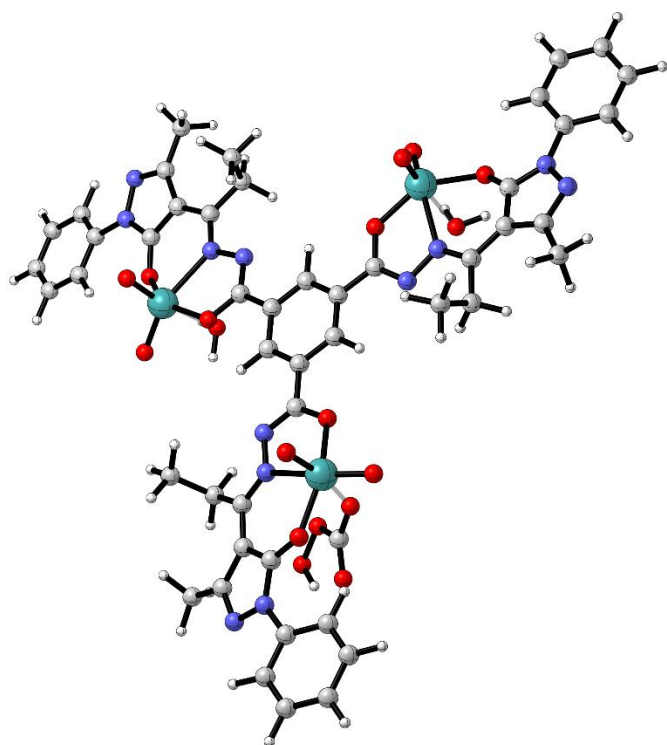

|    |               |              |               |
|----|---------------|--------------|---------------|
| O  | -31.977740083 | 22.583600674 | -21.077488593 |
| H  | -32.256683628 | 23.327214214 | -20.443099264 |
| O  | -33.253499329 | 22.514021939 | -21.790079346 |
| C  | -34.144575329 | 23.425820459 | -21.206231007 |
| O  | -33.709023593 | 24.163709708 | -20.305976811 |
| O  | -35.311349695 | 23.330720238 | -21.707815449 |
| O  | -32.558437447 | 15.966041558 | -26.958041809 |
| H  | -32.082836603 | 16.343158343 | -26.188914843 |
| H  | -31.931983911 | 15.304424619 | -27.316803689 |
| Mo | -34.074427440 | 14.417969454 | -25.721220886 |
| O  | -35.181403296 | 13.271382185 | -25.124149189 |
| N  | -35.998593368 | 16.115859265 | -27.483192827 |
| O  | -32.818436268 | 14.602209017 | -24.563987659 |
| N  | -35.292843565 | 14.947709806 | -27.594673671 |
| O  | -34.960700346 | 16.148908438 | -25.422500036 |
| N  | -33.882986749 | 11.035847396 | -29.652418468 |
| O  | -33.101994784 | 13.267133316 | -27.045536426 |
| N  | -33.160699230 | 11.446519864 | -28.554176359 |
| C  | -35.800430001 | 16.681774294 | -26.316617568 |
| C  | -35.492861001 | 14.230114357 | -28.697017883 |
| C  | -33.646184378 | 12.635636038 | -28.060034592 |
| C  | -34.739478899 | 13.016517134 | -28.879152505 |

|    |               |              |               |
|----|---------------|--------------|---------------|
| C  | -34.821257827 | 11.956895349 | -29.860319994 |
| C  | -32.052829775 | 10.672011187 | -28.116364125 |
| C  | -31.461247510 | 10.877855710 | -26.851797106 |
| H  | -31.855771695 | 11.642239092 | -26.173244396 |
| C  | -30.364589409 | 10.090000489 | -26.471639844 |
| H  | -29.908225348 | 10.255639605 | -25.484023662 |
| C  | -29.856479073 | 9.098856119  | -27.326737021 |
| H  | -28.994233124 | 8.488147536  | -27.019204008 |
| C  | -30.462036698 | 8.893334742  | -28.578380928 |
| H  | -30.078086220 | 8.116574687  | -29.257869682 |
| C  | -31.554133250 | 9.672988151  | -28.979185141 |
| H  | -32.045497273 | 9.528963928  | -29.949726155 |
| C  | -35.784670790 | 11.754921391 | -30.989637396 |
| H  | -35.645343600 | 12.506821077 | -31.794124924 |
| H  | -35.616326355 | 10.751378562 | -31.423598342 |
| H  | -36.837346817 | 11.824437519 | -30.650452111 |
| C  | -36.521941971 | 14.683617962 | -29.703639006 |
| H  | -36.440090119 | 15.784956021 | -29.787615655 |
| H  | -36.294098078 | 14.245872781 | -30.692314259 |
| C  | -37.954243509 | 14.324858652 | -29.264026134 |
| H  | -38.080853176 | 13.230345820 | -29.138314585 |
| H  | -38.187863437 | 14.809342775 | -28.296535255 |
| C  | -36.479617788 | 17.932632694 | -25.949087422 |
| C  | -36.199013098 | 18.546762259 | -24.714022425 |
| H  | -35.482778083 | 18.094824102 | -24.014382537 |
| O  | -38.686736714 | 21.662396241 | -30.549227402 |
| H  | -38.377190476 | 20.982476204 | -31.183843010 |
| H  | -39.154510866 | 22.309379175 | -31.116678789 |
| Mo | -40.678358053 | 20.361806052 | -29.782196841 |
| C  | -36.838882018 | 19.754710899 | -24.361007283 |
| C  | -37.753831890 | 20.340653104 | -25.252156118 |
| H  | -38.246215231 | 21.280882067 | -24.973600552 |
| C  | -38.037373167 | 19.723551658 | -26.491971582 |
| C  | -37.406393528 | 18.518530273 | -26.842775732 |
| H  | -37.624329457 | 18.034849208 | -27.803342893 |
| O  | -42.139450989 | 19.718204351 | -29.193525480 |
| N  | -39.510905153 | 21.526077404 | -27.151014668 |
| O  | -40.198431015 | 19.445454097 | -31.158274316 |
| N  | -40.409650517 | 21.904417636 | -28.110259976 |

|    |               |              |               |
|----|---------------|--------------|---------------|
| O  | -39.312477969 | 19.691119846 | -28.535524825 |
| N  | -43.618870810 | 24.628970307 | -30.052589750 |
| O  | -41.414345267 | 21.969202730 | -30.732504024 |
| N  | -43.089702098 | 23.636115901 | -30.848183493 |
| C  | -38.993953030 | 20.352570846 | -27.413841687 |
| C  | -41.075658260 | 23.035806971 | -27.884653627 |
| C  | -42.116690656 | 22.932097193 | -30.177739454 |
| C  | -42.009313241 | 23.493205967 | -28.880431680 |
| C  | -42.986675364 | 24.559908951 | -28.883042501 |
| C  | -43.554309184 | 23.485927358 | -32.181745340 |
| C  | -43.291421234 | 22.317084444 | -32.927755187 |
| H  | -42.721650659 | 21.492757685 | -32.484349621 |
| C  | -43.774564565 | 22.219267292 | -34.241275722 |
| H  | -43.567202516 | 21.304327569 | -34.817317116 |
| C  | -44.519775215 | 23.261565554 | -34.816746021 |
| H  | -44.895779711 | 23.173092475 | -35.846874567 |
| C  | -44.784883729 | 24.416656979 | -34.060508462 |
| H  | -45.370852061 | 25.241074107 | -34.495740737 |
| C  | -44.306489479 | 24.536165265 | -32.749651905 |
| H  | -44.505492463 | 25.424898430 | -32.137163872 |
| C  | -43.379830134 | 25.512915067 | -27.796767597 |
| H  | -42.571327254 | 26.237466154 | -27.568116822 |
| H  | -44.269878145 | 26.081336281 | -28.126306001 |
| H  | -43.625571664 | 24.983629897 | -26.854633525 |
| C  | -40.864337558 | 23.778138502 | -26.588440564 |
| H  | -39.782013139 | 23.742564015 | -26.356127827 |
| H  | -41.153975482 | 24.836184151 | -26.714662105 |
| C  | -41.638820207 | 23.137756698 | -25.420212182 |
| H  | -42.733234055 | 23.134799560 | -25.604328562 |
| H  | -41.310303564 | 22.091142800 | -25.273573046 |
| Mo | -37.176461485 | 22.351827134 | -20.991831340 |
| O  | -38.338047455 | 21.300309666 | -20.303091408 |
| N  | -35.697089801 | 19.890146957 | -22.240574508 |
| O  | -38.044608311 | 23.781407766 | -21.360809452 |
| N  | -35.596628501 | 20.635162260 | -21.091286325 |
| O  | -37.238945078 | 21.528801758 | -22.822393537 |
| N  | -33.498900368 | 22.086065816 | -17.200306279 |
| O  | -36.293258671 | 22.715988023 | -19.224743516 |
| N  | -34.655685372 | 22.750390499 | -17.551133982 |

|   |               |              |               |
|---|---------------|--------------|---------------|
| C | -36.569561489 | 20.412682619 | -23.066770516 |
| C | -34.540375444 | 20.396458176 | -20.322836037 |
| C | -35.208606560 | 22.232669756 | -18.702251021 |
| C | -34.360874751 | 21.164887821 | -19.120369557 |
| C | -33.305194512 | 21.156594080 | -18.131045039 |
| C | -35.084229980 | 23.856222269 | -16.781341426 |
| C | -35.939397608 | 24.840578260 | -17.321577350 |
| H | -36.268973919 | 24.763615331 | -18.363079361 |
| C | -36.336437108 | 25.917795719 | -16.516053634 |
| H | -37.001938880 | 26.684099088 | -16.943713592 |
| C | -35.886808669 | 26.036331006 | -15.190025057 |
| H | -36.204918923 | 26.887795253 | -14.568505268 |
| C | -35.018909391 | 25.060639466 | -14.668451876 |
| H | -34.649222769 | 25.144395037 | -13.634388712 |
| C | -34.617108552 | 23.972783714 | -15.454432872 |
| H | -33.932966921 | 23.201737802 | -15.076217157 |
| C | -32.061697099 | 20.325252548 | -18.045952683 |
| H | -31.381996468 | 20.571004402 | -18.888601185 |
| H | -31.544423699 | 20.561776199 | -17.096081042 |
| H | -32.271544706 | 19.237316227 | -18.080675313 |
| C | -33.550926264 | 19.329005595 | -20.724610987 |
| H | -33.476627098 | 19.350685563 | -21.827417720 |
| H | -32.555870794 | 19.580455194 | -20.321297319 |
| C | -33.999292470 | 17.930354722 | -20.266996522 |
| H | -34.118094494 | 17.880652708 | -19.164588923 |
| H | -34.975383656 | 17.676673481 | -20.725414056 |
| H | -33.263392680 | 17.158154671 | -20.572062134 |
| H | -38.691027949 | 14.678180290 | -30.012628998 |
| H | -41.441066147 | 23.690506863 | -24.480892377 |

1'b

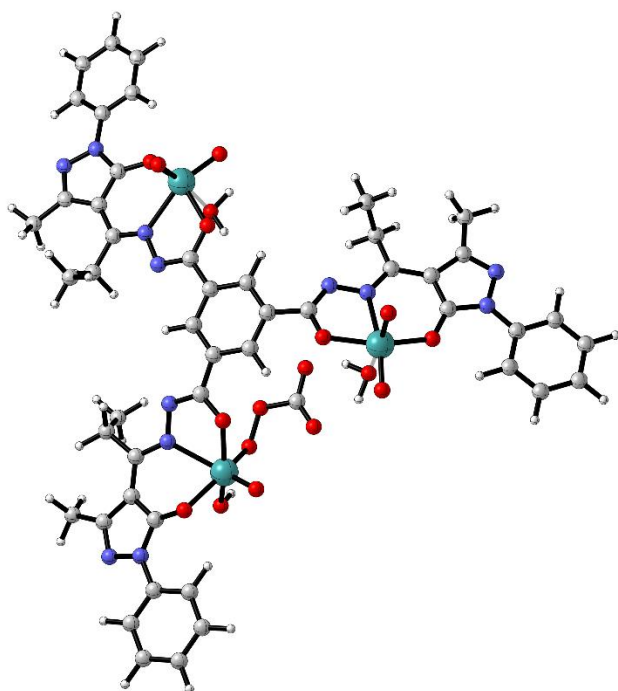

|    |              |               |               |
|----|--------------|---------------|---------------|
| O  | 4.785783667  | -8.996278322  | -12.482376997 |
| H  | 4.019463573  | -8.367644558  | -12.758445355 |
| H  | 5.049391159  | -8.481131780  | -11.667561624 |
| Mo | 4.268802418  | -11.136285823 | -11.902569912 |
| O  | 3.700234178  | -12.746376282 | -11.770779431 |
| N  | 1.766139128  | -10.197143277 | -13.556417268 |
| O  | 5.213555454  | -10.841841463 | -10.507409586 |
| N  | 2.956208536  | -10.836312014 | -13.810480659 |
| O  | 2.573870210  | -10.211893272 | -11.380476236 |
| N  | 6.153278636  | -12.915614920 | -16.467155667 |
| O  | 5.673082569  | -11.533831100 | -13.274880427 |
| N  | 6.550145344  | -12.580506815 | -15.191001121 |
| C  | 1.667636418  | -9.883010535  | -12.286402261 |
| C  | 3.163823767  | -11.244637916 | -15.054334406 |
| C  | 5.531887875  | -11.951946989 | -14.498242654 |
| C  | 4.422148027  | -11.866530050 | -15.384336440 |
| C  | 4.897635069  | -12.494031314 | -16.596332732 |
| C  | 7.862804621  | -12.909438902 | -14.763835812 |
| C  | 8.341237815  | -12.558329066 | -13.481696616 |
| H  | 7.693864812  | -12.016407970 | -12.783849829 |
| C  | 9.648926117  | -12.911643850 | -13.115385738 |
| H  | 10.009718942 | -12.632676485 | -12.113734747 |
| C  | 10.489081898 | -13.605252134 | -14.001577873 |



|    |              |               |               |
|----|--------------|---------------|---------------|
| H  | 11.512781316 | -13.876566715 | -13.702543439 |
| C  | 10.004972155 | -13.947489384 | -15.276402526 |
| H  | 10.650410082 | -14.488020717 | -15.986786249 |
| C  | 8.702470045  | -13.606185454 | -15.661611749 |
| H  | 8.303881226  | -13.862387959 | -16.650823877 |
| C  | 4.202730638  | -12.737680649 | -17.903225494 |
| H  | 4.001005143  | -11.792318242 | -18.450153728 |
| H  | 4.856887120  | -13.366910713 | -18.537086668 |
| H  | 3.232687581  | -13.257340941 | -17.767379085 |
| C  | 2.070615549  | -11.081398673 | -16.083927492 |
| H  | 1.578834579  | -10.108788984 | -15.886217152 |
| H  | 2.509649573  | -11.046022861 | -17.096999244 |
| C  | 1.020033340  | -12.200942995 | -15.983160666 |
| H  | 1.475476574  | -13.201726152 | -16.130052116 |
| H  | 0.547660698  | -12.187678355 | -14.981490495 |
| C  | 0.591560145  | -8.976527502  | -11.840549285 |
| C  | 0.857636660  | -8.181123361  | -10.714453971 |
| H  | 1.779081320  | -8.344914531  | -10.141995904 |
| O  | -3.017593752 | -6.586797311  | -16.338902540 |
| H  | -2.183425299 | -6.699774801  | -15.838412420 |
| H  | -2.906819608 | -7.206564757  | -17.090924141 |
| Mo | -4.564429124 | -8.167248006  | -15.116996997 |
| C  | 0.021660901  | -7.094185956  | -10.397586754 |
| C  | -1.145161143 | -6.861378716  | -11.143629057 |
| H  | -1.793366089 | -6.006449995  | -10.911363546 |
| C  | -1.450436064 | -7.703980365  | -12.235467392 |
| C  | -0.570648752 | -8.748665756  | -12.597590534 |
| H  | -0.769699897 | -9.356777803  | -13.489689961 |
| O  | -5.611564246 | -9.110207527  | -14.163631622 |
| N  | -3.417927012 | -6.406547707  | -12.824084069 |
| O  | -4.076893813 | -9.109867594  | -16.469745550 |
| N  | -4.468384172 | -6.356521204  | -13.707217727 |
| O  | -2.885554051 | -8.270075211  | -14.076758550 |
| N  | -8.320763113 | -4.535036385  | -15.558041286 |
| O  | -5.883238640 | -7.015885817  | -16.051029839 |
| N  | -7.765468182 | -5.604332009  | -16.226373071 |
| C  | -2.643086037 | -7.439731849  | -13.050950612 |
| C  | -5.306712985 | -5.330945555  | -13.565969785 |
| C  | -6.617085187 | -6.033611349  | -15.600296435 |

|    |               |               |               |
|----|---------------|---------------|---------------|
| C  | -6.416929365  | -5.201115433  | -14.469395213 |
| C  | -7.532612043  | -4.280931992  | -14.517034555 |
| C  | -8.391146020  | -6.090950051  | -17.406546169 |
| C  | -7.956920704  | -7.273464221  | -18.043453549 |
| H  | -7.116363774  | -7.843428663  | -17.634245447 |
| C  | -8.612517266  | -7.707611551  | -19.205215231 |
| H  | -8.268395242  | -8.631626036  | -19.693671584 |
| C  | -9.692073887  | -6.986004784  | -19.739257370 |
| H  | -10.197204585 | -7.335626388  | -20.651920589 |
| C  | -10.119442289 | -5.812533843  | -19.094586519 |
| H  | -10.966169132 | -5.236663541  | -19.498901677 |
| C  | -9.477445281  | -5.360374994  | -17.935098536 |
| H  | -9.794940782  | -4.448530559  | -17.414317548 |
| C  | -7.907349025  | -3.157827832  | -13.598385675 |
| H  | -7.177166617  | -2.323118424  | -13.646748222 |
| H  | -8.896678305  | -2.768742999  | -13.903587919 |
| H  | -7.964908374  | -3.488107732  | -12.542141549 |
| C  | -5.096398279  | -4.352199933  | -12.435904694 |
| H  | -4.006109571  | -4.190985117  | -12.333654263 |
| H  | -5.565124453  | -3.385078947  | -12.691176141 |
| C  | -5.648705958  | -4.889719560  | -11.101753620 |
| H  | -6.734724482  | -5.105144506  | -11.166834605 |
| H  | -5.129035419  | -5.827601923  | -10.826402800 |
| H  | 0.223639163   | -12.066602884 | -16.743132302 |
| H  | -5.487892618  | -4.153077180  | -10.288861126 |
| Mo | 2.865696155   | -4.971461151  | -8.177628901  |
| O  | 3.623844782   | -3.203806764  | -8.304412589  |
| N  | -0.117158270  | -5.004883591  | -9.121462609  |
| O  | 3.156493464   | -4.639966344  | -10.097155197 |
| N  | 0.653066493   | -4.236239336  | -8.313460814  |
| O  | 1.658750987   | -6.418326159  | -8.802256275  |
| N  | 1.515845002   | -1.121967917  | -5.035851323  |
| O  | 2.496300672   | -4.246298660  | -6.286768954  |
| N  | 2.308527963   | -2.243892127  | -5.048650943  |
| C  | 0.513762139   | -6.136867787  | -9.397836796  |
| C  | 0.104540044   | -3.140422947  | -7.778028451  |
| C  | 1.941854807   | -3.104061345  | -6.068070108  |
| C  | 0.836551569   | -2.485414416  | -6.742076901  |
| C  | 0.633115002   | -1.250728179  | -6.023509445  |

|   |              |              |               |
|---|--------------|--------------|---------------|
| C | 3.358980228  | -2.375614188 | -4.100238241  |
| C | 4.326688367  | -3.396737822 | -4.213329361  |
| H | 4.279208859  | -4.112771899 | -5.041437113  |
| C | 5.346729464  | -3.480377062 | -3.253843356  |
| H | 6.099166017  | -4.278471121 | -3.350135643  |
| C | 5.417929119  | -2.566245944 | -2.189850187  |
| H | 6.223790648  | -2.643132751 | -1.443455152  |
| C | 4.450868216  | -1.551134011 | -2.090251461  |
| H | 4.493491879  | -0.825280814 | -1.262647480  |
| C | 3.423149366  | -1.450021615 | -3.036967294  |
| H | 2.662148719  | -0.660690320 | -2.982662924  |
| C | -0.356776465 | -0.151432198 | -6.261759176  |
| H | -1.390120965 | -0.456474442 | -5.991507012  |
| H | -0.084546176 | 0.718917094  | -5.635346273  |
| H | -0.370226931 | 0.164555384  | -7.324485930  |
| C | -1.244423071 | -2.667903944 | -8.263880456  |
| H | -1.893587086 | -3.562157565 | -8.350193983  |
| H | -1.696049250 | -1.987479674 | -7.519668115  |
| C | -1.149296792 | -1.986456284 | -9.641833645  |
| H | -0.486822023 | -1.097551233 | -9.611747308  |
| H | -0.740268525 | -2.693149537 | -10.389999617 |
| H | -2.151107049 | -1.658501118 | -9.984717328  |
| O | 4.005264353  | -6.050849628 | -7.548280882  |
| O | 2.634250664  | -5.483964499 | -11.154518257 |
| C | 3.476128332  | -6.608211403 | -11.481310240 |
| O | 4.434271941  | -6.893930872 | -10.753610607 |
| O | 3.013085274  | -7.139385003 | -12.529621471 |
| H | 3.735246785  | -2.946765842 | -9.247994633  |

1'c

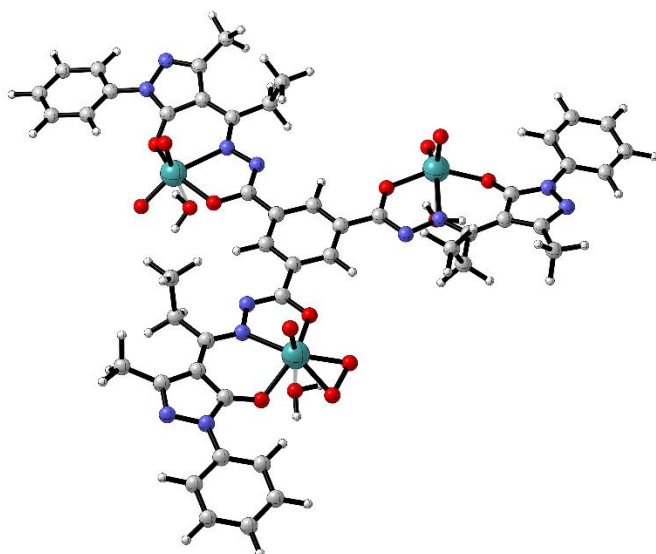

|    |              |              |              |
|----|--------------|--------------|--------------|
| O  | 20.580192000 | -6.527487000 | 16.476516000 |
| H  | 20.759348000 | -7.236263000 | 17.129269000 |
| H  | 20.966768000 | -5.729857000 | 16.893458000 |
| Mo | 22.438193000 | -7.088098000 | 14.906225000 |
| O  | 23.666489000 | -7.240678000 | 13.739852000 |
| N  | 20.014816000 | -6.639359000 | 13.004823000 |
| O  | 22.881513000 | -8.023504000 | 16.277828000 |
| N  | 20.994904000 | -5.879985000 | 13.589241000 |
| O  | 21.033488000 | -8.306385000 | 14.236216000 |
| N  | 23.432965000 | -2.013831000 | 14.378032000 |
| O  | 22.866467000 | -5.263682000 | 15.599097000 |
| N  | 23.683807000 | -3.081711000 | 15.211294000 |
| C  | 20.114139000 | -7.895163000 | 13.359670000 |
| C  | 21.053664000 | -4.599146000 | 13.222960000 |
| C  | 22.872418000 | -4.145022000 | 14.908286000 |
| C  | 22.052485000 | -3.754587000 | 13.816561000 |
| C  | 22.466304000 | -2.392750000 | 13.546262000 |
| C  | 24.653138000 | -2.954950000 | 16.245078000 |
| C  | 25.216017000 | -4.089362000 | 16.865616000 |
| H  | 24.921289000 | -5.097323000 | 16.553377000 |
| C  | 26.165316000 | -3.912244000 | 17.883420000 |
| H  | 26.603235000 | -4.799652000 | 18.364156000 |
| C  | 26.564222000 | -2.625413000 | 18.279494000 |
| H  | 27.310700000 | -2.496427000 | 19.077776000 |
| C  | 26.006737000 | -1.502890000 | 17.643835000 |
| H  | 26.315779000 | -0.489348000 | 17.940925000 |

|    |              |               |              |
|----|--------------|---------------|--------------|
| C  | 25.052550000 | -1.658855000  | 16.630220000 |
| H  | 24.608406000 | -0.797790000  | 16.115119000 |
| C  | 22.000204000 | -1.425887000  | 12.501668000 |
| H  | 20.957478000 | -1.090909000  | 12.682635000 |
| H  | 22.653907000 | -0.534337000  | 12.525524000 |
| H  | 22.036355000 | -1.866307000  | 11.485227000 |
| C  | 20.110547000 | -4.082042000  | 12.164902000 |
| H  | 19.123539000 | -4.554115000  | 12.334181000 |
| H  | 19.991295000 | -2.989814000  | 12.277473000 |
| C  | 20.597422000 | -4.431735000  | 10.745160000 |
| H  | 21.598245000 | -4.000557000  | 10.540315000 |
| H  | 20.665012000 | -5.530189000  | 10.623711000 |
| C  | 19.221880000 | -8.919851000  | 12.790298000 |
| C  | 19.399193000 | -10.268508000 | 13.143707000 |
| H  | 20.187262000 | -10.550619000 | 13.854312000 |
| O  | 13.423532000 | -7.410409000  | 10.556985000 |
| H  | 13.587055000 | -6.501039000  | 10.885215000 |
| H  | 12.574396000 | -7.327391000  | 10.076229000 |
| Mo | 15.008938000 | -7.227804000  | 8.630142000  |
| C  | 18.577012000 | -11.263577000 | 12.570204000 |
| C  | 17.572826000 | -10.904570000 | 11.655392000 |
| H  | 16.938471000 | -11.677682000 | 11.203572000 |
| C  | 17.390936000 | -9.547909000  | 11.304266000 |
| C  | 18.213814000 | -8.558144000  | 11.868976000 |
| H  | 18.081479000 | -7.505510000  | 11.587683000 |
| O  | 15.965108000 | -7.280689000  | 7.224659000  |
| N  | 15.589001000 | -10.066252000 | 9.767816000  |
| O  | 14.929463000 | -5.593804000  | 9.158030000  |
| N  | 14.744476000 | -9.496653000  | 8.850719000  |
| O  | 16.236653000 | -7.867293000  | 10.041214000 |
| N  | 11.505348000 | -9.483753000  | 5.531262000  |
| O  | 13.201630000 | -7.394871000  | 7.797251000  |
| N  | 11.838001000 | -8.262554000  | 6.075253000  |
| C  | 16.355126000 | -9.165530000  | 10.328585000 |
| C  | 13.988612000 | -10.332473000 | 8.137820000  |
| C  | 12.768635000 | -8.402385000  | 7.072127000  |
| C  | 13.065635000 | -9.786499000  | 7.182355000  |
| C  | 12.221382000 | -10.400144000 | 6.177254000  |
| C  | 11.193731000 | -7.083492000  | 5.608185000  |



|    |              |               |              |
|----|--------------|---------------|--------------|
| C  | 11.766410000 | -5.810123000  | 5.807084000  |
| H  | 12.730202000 | -5.708350000  | 6.318333000  |
| C  | 11.091962000 | -4.675576000  | 5.331731000  |
| H  | 11.541800000 | -3.683283000  | 5.486881000  |
| C  | 9.866905000  | -4.797266000  | 4.655717000  |
| H  | 9.347341000  | -3.901262000  | 4.285182000  |
| C  | 9.313548000  | -6.073138000  | 4.450490000  |
| H  | 8.356005000  | -6.181597000  | 3.919331000  |
| C  | 9.968453000  | -7.217359000  | 4.923752000  |
| H  | 9.559847000  | -8.224298000  | 4.769626000  |
| C  | 12.080439000 | -11.835971000 | 5.773456000  |
| H  | 11.609357000 | -12.446982000 | 6.571686000  |
| H  | 11.438602000 | -11.889633000 | 4.874195000  |
| H  | 13.060831000 | -12.295879000 | 5.536170000  |
| C  | 14.152192000 | -11.821597000 | 8.314334000  |
| H  | 14.301183000 | -12.016963000 | 9.393891000  |
| H  | 13.228288000 | -12.335282000 | 7.995622000  |
| C  | 15.366861000 | -12.360058000 | 7.534262000  |
| H  | 15.276249000 | -12.160337000 | 6.446491000  |
| H  | 16.297070000 | -11.879377000 | 7.893595000  |
| H  | 19.890395000 | -4.041616000  | 9.986793000  |
| H  | 15.465454000 | -13.454189000 | 7.680361000  |
| Mo | 18.416296000 | -15.542298000 | 12.552904000 |
| O  | 19.570694000 | -15.799066000 | 11.349825000 |
| N  | 19.754651000 | -13.042651000 | 13.710841000 |
| O  | 16.684097000 | -15.574858000 | 11.693170000 |
| N  | 19.860859000 | -14.408137000 | 13.796816000 |
| O  | 17.993007000 | -13.580276000 | 12.334145000 |
| N  | 21.893678000 | -18.337060000 | 15.217645000 |
| O  | 18.940138000 | -17.050306000 | 13.816199000 |
| N  | 20.638617000 | -18.459786000 | 14.655299000 |
| C  | 18.795360000 | -12.685045000 | 12.898463000 |
| C  | 20.900759000 | -14.858500000 | 14.518029000 |
| C  | 20.127490000 | -17.229697000 | 14.321060000 |
| C  | 21.099732000 | -16.259319000 | 14.686317000 |
| C  | 22.181932000 | -17.041598000 | 15.250474000 |
| C  | 20.058502000 | -19.752236000 | 14.515707000 |
| C  | 18.888135000 | -19.956367000 | 13.753954000 |
| H  | 18.402742000 | -19.115792000 | 13.247308000 |

|   |              |               |              |
|---|--------------|---------------|--------------|
| C | 18.356428000 | -21.250768000 | 13.651154000 |
| H | 17.442128000 | -21.403942000 | 13.058283000 |
| C | 18.975738000 | -22.338868000 | 14.286791000 |
| H | 18.549843000 | -23.349607000 | 14.198500000 |
| C | 20.147218000 | -22.124977000 | 15.033141000 |
| H | 20.647478000 | -22.969324000 | 15.531040000 |
| C | 20.691789000 | -20.839821000 | 15.152960000 |
| H | 21.609331000 | -20.651599000 | 15.724175000 |
| C | 23.508330000 | -16.611067000 | 15.797160000 |
| H | 23.400154000 | -16.057960000 | 16.753512000 |
| H | 24.122062000 | -17.510769000 | 15.989414000 |
| H | 24.050869000 | -15.952519000 | 15.089109000 |
| C | 21.870831000 | -13.858077000 | 15.098245000 |
| H | 21.282488000 | -13.013588000 | 15.505348000 |
| H | 22.417732000 | -14.328011000 | 15.934312000 |
| C | 22.854452000 | -13.320898000 | 14.042414000 |
| H | 23.453890000 | -14.138026000 | 13.593824000 |
| H | 22.305881000 | -12.809656000 | 13.228186000 |
| H | 23.550140000 | -12.590646000 | 14.501491000 |
| O | 17.011663000 | -16.855415000 | 12.264776000 |
| O | 16.983834000 | -15.118115000 | 14.478732000 |
| H | 16.716393000 | -16.033944000 | 14.701893000 |
| H | 16.201830000 | -14.751240000 | 14.014960000 |

2'a

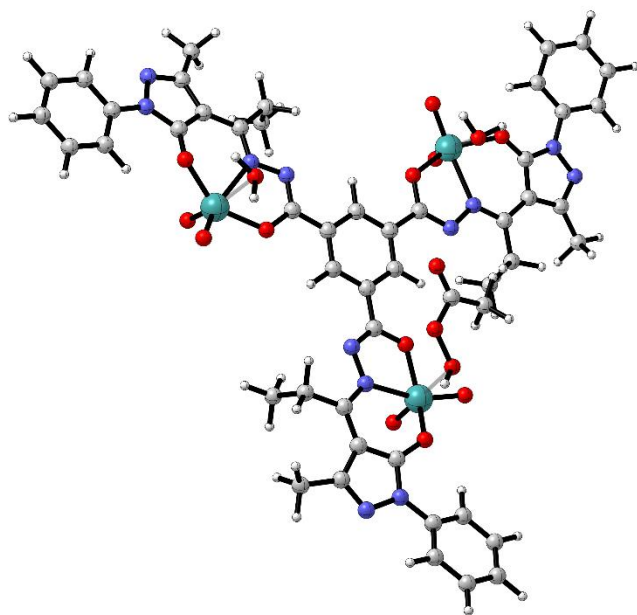

|    |               |             |               |
|----|---------------|-------------|---------------|
| O  | -49.275445373 | 5.004717627 | -42.699475488 |
| H  | -49.719402039 | 5.877993123 | -42.708681212 |
| H  | -48.749380535 | 5.020868863 | -41.873216432 |
| Mo | -51.192143746 | 3.631769173 | -41.891792621 |
| O  | -52.311859431 | 2.507406409 | -41.280147543 |
| N  | -50.040722637 | 1.996471495 | -44.276301377 |
| O  | -51.773705668 | 5.210946470 | -41.543540295 |
| N  | -49.841265319 | 2.092767548 | -42.924014419 |
| O  | -51.570743506 | 3.667964815 | -43.832171915 |
| N  | -48.026591102 | 0.913274432 | -38.824944524 |
| O  | -49.786049378 | 3.474978126 | -40.477029264 |
| N  | -48.711270998 | 2.108567237 | -38.871719838 |
| C  | -50.970065941 | 2.826647717 | -44.676927496 |
| C  | -49.002791778 | 1.211619351 | -42.378139372 |
| C  | -49.152029396 | 2.371567069 | -40.144386297 |
| C  | -48.736468125 | 1.292604286 | -40.968902950 |
| C  | -48.026182726 | 0.418361374 | -40.059035929 |
| C  | -48.855030576 | 2.877030680 | -37.681874342 |
| C  | -49.716277379 | 3.993333682 | -37.621025904 |
| H  | -50.300078849 | 4.293048263 | -38.497876081 |
| C  | -49.822057030 | 4.712142614 | -36.420458639 |
| H  | -50.495969985 | 5.581345940 | -36.378526456 |
| C  | -49.089754949 | 4.331995646 | -35.284303780 |

|    |               |              |               |
|----|---------------|--------------|---------------|
| H  | -49.182853736 | 4.901204560  | -34.347253188 |
| C  | -48.241013434 | 3.213963784  | -35.354309312 |
| H  | -47.665396008 | 2.900669073  | -34.470035605 |
| C  | -48.117983639 | 2.485451952  | -36.544391052 |
| H  | -47.468683536 | 1.604290206  | -36.619852397 |
| C  | -47.355805088 | -0.898280107 | -40.303991177 |
| H  | -46.451380823 | -0.789002623 | -40.937761248 |
| H  | -47.044537509 | -1.324231691 | -39.332288839 |
| H  | -48.031564655 | -1.617514064 | -40.808318881 |
| C  | -48.402638086 | 0.124798801  | -43.235158667 |
| H  | -48.158543323 | 0.569053596  | -44.219138999 |
| H  | -47.462267704 | -0.231421145 | -42.778988239 |
| C  | -49.385566378 | -1.043831623 | -43.441643053 |
| H  | -49.683082325 | -1.502579505 | -42.476870446 |
| H  | -50.303413655 | -0.686787241 | -43.946527453 |
| C  | -51.393172860 | 2.871167594  | -46.087357331 |
| C  | -52.418805060 | 3.749506242  | -46.478876389 |
| H  | -52.891904705 | 4.408540899  | -45.739547750 |
| O  | -47.339835222 | 1.279150244  | -50.650533461 |
| H  | -46.697183533 | 1.216618145  | -49.913896263 |
| H  | -46.831145634 | 0.970698782  | -51.429397707 |
| Mo | -48.640824337 | -0.803442826 | -50.245930226 |
| C  | -52.836865005 | 3.784158067  | -47.826540174 |
| C  | -52.225696614 | 2.947062204  | -48.773560713 |
| H  | -52.546287885 | 2.971640676  | -49.822381614 |
| C  | -51.176274776 | 2.088091610  | -48.387433325 |
| C  | -50.765979123 | 2.041852213  | -47.044477022 |
| H  | -49.953321339 | 1.369712990  | -46.738507396 |
| O  | -49.630122166 | -2.186380801 | -50.233973024 |
| N  | -50.832216416 | 1.366178436  | -50.668338189 |
| O  | -47.261714050 | -1.127941199 | -49.274653888 |
| N  | -50.112069743 | 0.493643690  | -51.440029181 |
| O  | -49.539608245 | 0.437181706  | -48.993044885 |
| N  | -48.892130790 | -1.685304009 | -55.344659930 |
| O  | -47.823771977 | -1.012275966 | -52.060073051 |
| N  | -48.041947812 | -1.824510173 | -54.269591396 |
| C  | -50.501939990 | 1.264342751  | -49.404490671 |
| C  | -50.442734562 | 0.419531016  | -52.728962988 |
| C  | -48.486050880 | -1.099275081 | -53.193245542 |

|    |               |              |               |
|----|---------------|--------------|---------------|
| C  | -49.689846125 | -0.455263242 | -53.584344061 |
| C  | -49.873210068 | -0.874275426 | -54.958179565 |
| C  | -46.864397602 | -2.612212975 | -54.403047855 |
| C  | -46.155908278 | -3.071902622 | -53.273355541 |
| H  | -46.507833976 | -2.836447227 | -52.263097168 |
| C  | -44.997507085 | -3.841543703 | -53.458945412 |
| H  | -44.448073391 | -4.198913432 | -52.575233570 |
| C  | -44.545644170 | -4.163800575 | -54.748902490 |
| H  | -43.635181029 | -4.766619862 | -54.883535258 |
| C  | -45.268247940 | -3.712301437 | -55.866540515 |
| H  | -44.928618725 | -3.963653086 | -56.882714393 |
| C  | -46.423636979 | -2.937435720 | -55.702420939 |
| H  | -47.007513423 | -2.578509875 | -56.559351149 |
| C  | -50.969937181 | -0.561780427 | -55.929380843 |
| H  | -50.957044982 | 0.503423378  | -56.241232582 |
| H  | -50.832599279 | -1.183641554 | -56.833160446 |
| H  | -51.970855661 | -0.772676979 | -55.502424024 |
| C  | -51.618424264 | 1.213155929  | -53.243884817 |
| H  | -51.597007084 | 2.202106373  | -52.747080093 |
| H  | -51.512924820 | 1.373507940  | -54.331695399 |
| C  | -52.958232270 | 0.523438716  | -52.922833875 |
| H  | -53.012793124 | -0.486000133 | -53.376066723 |
| H  | -53.081564516 | 0.414041219  | -51.827970909 |
| H  | -48.925315233 | -1.829709094 | -44.072952682 |
| H  | -53.805784267 | 1.123279052  | -53.309637487 |
| Mo | -55.691550777 | 5.745146632  | -50.312905518 |
| O  | -57.132426988 | 4.936463268  | -49.915330322 |
| N  | -54.346905429 | 5.661056434  | -47.492691768 |
| O  | -55.333745567 | 5.409184279  | -51.954336150 |
| N  | -55.250541588 | 6.446880441  | -48.159929890 |
| O  | -54.252144958 | 4.630236803  | -49.555030230 |
| N  | -58.275259545 | 9.923081888  | -48.654607005 |
| O  | -56.323825470 | 7.625194280  | -50.468594746 |
| N  | -57.848932401 | 9.306821024  | -49.809994288 |
| C  | -53.870596468 | 4.727970009  | -48.275205130 |
| C  | -55.840785659 | 7.412057095  | -47.453412929 |
| C  | -56.933541242 | 8.324541089  | -49.534138269 |
| C  | -56.753559290 | 8.294752762  | -48.125385261 |
| C  | -57.634381284 | 9.339703041  | -47.645563385 |



|   |               |              |               |
|---|---------------|--------------|---------------|
| C | -58.334449341 | 9.761379597  | -51.068952150 |
| C | -58.220996960 | 8.968297054  | -52.229732046 |
| H | -57.762185935 | 7.974692119  | -52.184074806 |
| C | -58.710795368 | 9.464711402  | -53.447116470 |
| H | -58.621849972 | 8.842680250  | -54.350597195 |
| C | -59.316333204 | 10.729775549 | -53.518034822 |
| H | -59.699133880 | 11.107719161 | -54.477610801 |
| C | -59.435073030 | 11.505612873 | -52.351950707 |
| H | -59.911237248 | 12.496723938 | -52.392962192 |
| C | -58.946867446 | 11.030164638 | -51.128036668 |
| H | -59.034342028 | 11.615281290 | -50.203745049 |
| C | -57.921371082 | 9.801912214  | -46.249731808 |
| H | -57.040694070 | 10.296291166 | -45.788519611 |
| H | -58.749814224 | 10.534582889 | -46.282605630 |
| H | -58.215910786 | 8.962044169  | -45.589017748 |
| C | -55.568763018 | 7.527228390  | -45.974853604 |
| H | -54.491845684 | 7.323281431  | -45.817983203 |
| H | -55.777784689 | 8.558186742  | -45.639469507 |
| C | -56.393533492 | 6.512602030  | -45.161224049 |
| H | -57.483182953 | 6.651046650  | -45.317558254 |
| H | -56.133460188 | 5.478555480  | -45.460657800 |
| H | -56.180645220 | 6.622124202  | -44.078989376 |
| O | -53.611149174 | 7.255137903  | -50.698352835 |
| H | -53.902113689 | 8.140468973  | -50.384194823 |
| O | -50.690443084 | 5.830921314  | -49.463498104 |
| C | -51.590936205 | 6.079540900  | -50.232004706 |
| O | -52.478497041 | 7.040802064  | -49.760356718 |
| C | -51.838148983 | 5.493288974  | -51.590214525 |
| H | -51.045865314 | 4.749922860  | -51.785297515 |
| H | -52.836509239 | 5.017112395  | -51.638770760 |
| H | -51.831525476 | 6.288645563  | -52.361637207 |

2'b

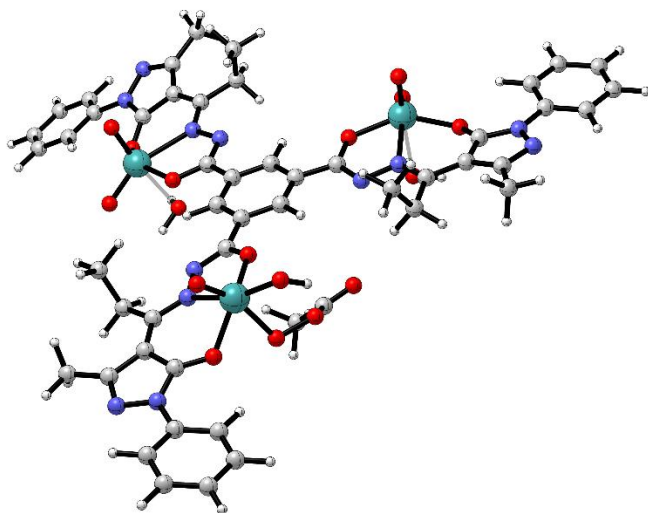

|    |               |               |               |
|----|---------------|---------------|---------------|
| O  | -37.375293000 | -15.951521000 | -17.467046000 |
| H  | -36.799478000 | -16.493596000 | -16.887641000 |
| H  | -36.866327000 | -15.888978000 | -18.301516000 |
| Mo | -38.945119000 | -17.800389000 | -18.058184000 |
| O  | -40.068694000 | -18.923507000 | -18.664990000 |
| N  | -40.784834000 | -15.325447000 | -17.638862000 |
| O  | -37.711364000 | -18.665084000 | -17.229928000 |
| N  | -40.105805000 | -15.919890000 | -18.670182000 |
| O  | -39.837083000 | -17.065368000 | -16.451938000 |
| N  | -38.742523000 | -16.481480000 | -23.065168000 |
| O  | -37.973537000 | -17.385130000 | -19.753482000 |
| N  | -38.042440000 | -17.179612000 | -22.105569000 |
| C  | -40.618472000 | -15.985453000 | -16.521120000 |
| C  | -40.304399000 | -15.412791000 | -19.887995000 |
| C  | -38.513527000 | -16.899305000 | -20.849327000 |
| C  | -39.579224000 | -15.971779000 | -20.994231000 |
| C  | -39.655934000 | -15.756882000 | -22.424752000 |
| C  | -36.958433000 | -18.015982000 | -22.492622000 |
| C  | -36.483007000 | -19.036729000 | -21.643949000 |
| H  | -36.950073000 | -19.212803000 | -20.668527000 |
| C  | -35.407287000 | -19.831259000 | -22.067268000 |
| H  | -35.039218000 | -20.627921000 | -21.403022000 |
| C  | -34.811444000 | -19.626908000 | -23.322320000 |
| H  | -33.967722000 | -20.255751000 | -23.643940000 |
| C  | -35.304440000 | -18.616377000 | -24.165625000 |

|    |               |               |               |
|----|---------------|---------------|---------------|
| H  | -34.850088000 | -18.450820000 | -25.154107000 |
| C  | -36.373366000 | -17.808082000 | -23.758262000 |
| H  | -36.778993000 | -17.016531000 | -24.401712000 |
| C  | -40.590485000 | -14.907384000 | -23.230075000 |
| H  | -40.420701000 | -13.824036000 | -23.057073000 |
| H  | -40.422174000 | -15.115818000 | -24.303809000 |
| H  | -41.651604000 | -15.119702000 | -22.989105000 |
| C  | -41.309222000 | -14.304479000 | -20.078654000 |
| H  | -41.208368000 | -13.609276000 | -19.222549000 |
| H  | -41.075937000 | -13.746455000 | -21.002943000 |
| C  | -42.753122000 | -14.840603000 | -20.118043000 |
| H  | -42.895120000 | -15.572896000 | -20.938498000 |
| H  | -43.002460000 | -15.342507000 | -19.163242000 |
| C  | -41.283359000 | -15.554655000 | -15.278765000 |
| C  | -41.134907000 | -16.320534000 | -14.109016000 |
| H  | -40.527143000 | -17.234614000 | -14.123960000 |
| O  | -42.521152000 | -9.423386000  | -14.489317000 |
| H  | -42.228346000 | -9.245712000  | -15.408089000 |
| H  | -42.820013000 | -8.546179000  | -14.173282000 |
| Mo | -44.719959000 | -10.386690000 | -15.203380000 |
| C  | -41.778066000 | -15.913693000 | -12.919113000 |
| C  | -42.546534000 | -14.737459000 | -12.895560000 |
| H  | -43.032211000 | -14.400950000 | -11.971044000 |
| C  | -42.674022000 | -13.957501000 | -14.064939000 |
| C  | -42.058084000 | -14.372281000 | -15.257705000 |
| H  | -42.163742000 | -13.772010000 | -16.170850000 |
| O  | -46.284505000 | -10.996228000 | -15.473043000 |
| N  | -43.880197000 | -12.249514000 | -12.867561000 |
| O  | -44.113546000 | -9.775471000  | -16.691771000 |
| N  | -44.566979000 | -11.076227000 | -13.022733000 |
| O  | -43.601654000 | -12.019693000 | -15.149768000 |
| N  | -47.113342000 | -7.468713000  | -11.622749000 |
| O  | -45.180943000 | -8.660733000  | -14.310743000 |
| N  | -46.605595000 | -7.404499000  | -12.902656000 |
| C  | -43.428708000 | -12.693604000 | -14.010553000 |
| C  | -45.112345000 | -10.563424000 | -11.917839000 |
| C  | -45.831206000 | -8.503175000  | -13.179123000 |
| C  | -45.831722000 | -9.324815000  | -12.021319000 |
| C  | -46.661037000 | -8.596935000  | -11.083746000 |

|    |               |               |               |
|----|---------------|---------------|---------------|
| C  | -46.889812000 | -6.268447000  | -13.711633000 |
| C  | -46.621705000 | -6.262037000  | -15.096848000 |
| H  | -46.191277000 | -7.144273000  | -15.583317000 |
| C  | -46.916859000 | -5.113235000  | -15.846741000 |
| H  | -46.704989000 | -5.114284000  | -16.926739000 |
| C  | -47.479984000 | -3.979686000  | -15.238359000 |
| H  | -47.710337000 | -3.084864000  | -15.835949000 |
| C  | -47.752672000 | -4.001416000  | -13.859687000 |
| H  | -48.198492000 | -3.121648000  | -13.370698000 |
| C  | -47.460757000 | -5.136549000  | -13.092682000 |
| H  | -47.671568000 | -5.178320000  | -12.016583000 |
| C  | -47.075865000 | -8.943015000  | -9.686714000  |
| H  | -46.218899000 | -8.910202000  | -8.981694000  |
| H  | -47.830287000 | -8.208625000  | -9.346839000  |
| H  | -47.517084000 | -9.958330000  | -9.628891000  |
| C  | -44.988877000 | -11.304744000 | -10.610627000 |
| H  | -43.954093000 | -11.692671000 | -10.528579000 |
| H  | -45.151818000 | -10.600588000 | -9.776307000  |
| C  | -45.973527000 | -12.484669000 | -10.514967000 |
| H  | -47.028491000 | -12.152253000 | -10.598259000 |
| H  | -45.778449000 | -13.215371000 | -11.323568000 |
| H  | -43.468212000 | -14.007941000 | -20.266855000 |
| H  | -45.852450000 | -13.006208000 | -9.544323000  |
| Mo | -42.295564000 | -17.243230000 | -8.873585000  |
| O  | -43.033945000 | -18.770797000 | -8.775591000  |
| N  | -40.671430000 | -17.578621000 | -11.525428000 |
| O  | -43.791179000 | -16.228494000 | -8.360385000  |
| N  | -40.704853000 | -18.109791000 | -10.264634000 |
| O  | -42.434719000 | -16.395817000 | -10.658652000 |
| N  | -39.215716000 | -20.870934000 | -6.837772000  |
| O  | -40.977820000 | -17.899870000 | -7.484559000  |
| N  | -39.927363000 | -19.750380000 | -6.458290000  |
| C  | -41.611931000 | -16.682238000 | -11.679571000 |
| C  | -39.878212000 | -19.141881000 | -10.024432000 |
| C  | -40.304342000 | -19.015936000 | -7.549677000  |
| C  | -39.781002000 | -19.672439000 | -8.704379000  |
| C  | -39.105944000 | -20.835914000 | -8.160141000  |
| C  | -40.214979000 | -19.527361000 | -5.082148000  |
| C  | -40.673863000 | -18.273330000 | -4.628041000  |

|   |               |               |               |
|---|---------------|---------------|---------------|
| H | -40.803645000 | -17.441505000 | -5.330646000  |
| C | -40.958287000 | -18.105291000 | -3.264495000  |
| H | -41.320497000 | -17.127840000 | -2.911810000  |
| C | -40.781353000 | -19.161209000 | -2.355732000  |
| H | -41.010370000 | -19.018349000 | -1.288991000  |
| C | -40.308607000 | -20.401110000 | -2.819522000  |
| H | -40.160771000 | -21.235468000 | -2.117025000  |
| C | -40.025179000 | -20.592230000 | -4.177924000  |
| H | -39.654421000 | -21.550530000 | -4.562740000  |
| C | -38.382493000 | -21.947317000 | -8.856489000  |
| H | -37.419839000 | -21.605811000 | -9.290505000  |
| H | -38.161249000 | -22.743464000 | -8.121597000  |
| H | -38.987350000 | -22.377180000 | -9.679603000  |
| C | -39.091706000 | -19.726519000 | -11.171791000 |
| H | -38.721115000 | -18.884307000 | -11.787457000 |
| H | -38.217155000 | -20.272241000 | -10.777801000 |
| C | -39.960036000 | -20.649816000 | -12.047916000 |
| H | -40.370401000 | -21.496881000 | -11.462533000 |
| H | -40.810239000 | -20.088039000 | -12.479892000 |
| H | -39.360721000 | -21.062785000 | -12.882913000 |
| O | -41.180263000 | -15.618249000 | -8.143594000  |
| O | -41.922476000 | -12.670943000 | -9.877950000  |
| C | -41.297717000 | -13.636662000 | -9.490836000  |
| O | -41.898340000 | -14.387341000 | -8.498208000  |
| C | -39.933876000 | -14.074145000 | -9.945432000  |
| H | -39.549926000 | -13.326955000 | -10.661558000 |
| H | -39.256393000 | -14.182274000 | -9.076226000  |
| H | -39.980693000 | -15.068289000 | -10.430618000 |
| H | -43.625299000 | -15.248779000 | -8.372601000  |

**$1^{\circ}\text{c}$  for mechanism the oxidation of 7-methylnaphthalene in Fig 20.**

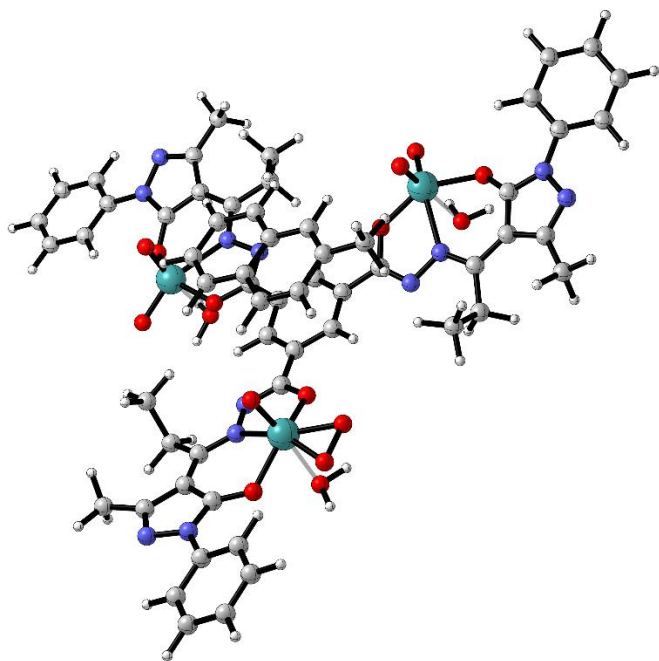

|    |              |              |              |
|----|--------------|--------------|--------------|
| Mo | 2.685635462  | -1.509227046 | 12.987899302 |
| O  | 2.154160517  | -2.989824657 | 12.369450620 |
| N  | 3.296505882  | -2.676624133 | 15.751704319 |
| O  | 3.992576316  | -0.834342076 | 11.736366957 |
| N  | 2.224238510  | -2.170605742 | 15.059355459 |
| O  | 4.426277992  | -1.981542579 | 13.875958765 |
| N  | -2.296958379 | -1.251913914 | 14.496882829 |
| O  | 0.882018398  | -0.593702202 | 13.162188925 |
| N  | -1.436724420 | -0.728612092 | 13.553438424 |
| C  | 4.400247211  | -2.597711450 | 15.055833640 |
| C  | 1.040590138  | -2.267610757 | 15.685998878 |
| C  | -0.130642082 | -1.022777941 | 13.857486062 |
| C  | -0.143500868 | -1.786844031 | 15.056471722 |
| C  | -1.549923091 | -1.879425295 | 15.398254311 |
| C  | -1.958490786 | 0.025751387  | 12.466324400 |
| C  | -1.196044913 | 0.251553728  | 11.301147643 |
| H  | -0.182850066 | -0.155793183 | 11.213600851 |
| C  | -1.754177244 | 1.000510301  | 10.254258751 |
| H  | -1.156204340 | 1.174536348  | 9.346771416  |
| C  | -3.057529370 | 1.514754878  | 10.350630956 |
| H  | -3.485839015 | 2.097786636  | 9.521374783  |
| C  | -3.811843809 | 1.272363998  | 11.511693541 |

|   |              |              |              |
|---|--------------|--------------|--------------|
| H | -4.836163597 | 1.665159135  | 11.597392853 |
| C | -3.270097031 | 0.532492332  | 12.571215657 |
| H | -3.843430654 | 0.324948372  | 13.483858988 |
| C | -2.229717052 | -2.573177781 | 16.538449960 |
| H | -2.006230840 | -2.087735397 | 17.511672161 |
| H | -3.323638319 | -2.533226918 | 16.376959269 |
| H | -1.920653060 | -3.634815953 | 16.617573557 |
| C | 0.987238333  | -2.938226510 | 17.037708242 |
| H | 1.860996367  | -2.590100546 | 17.621559334 |
| H | 0.073323219  | -2.613882520 | 17.565474967 |
| C | 1.035680952  | -4.472803245 | 16.930167657 |
| H | 0.186077746  | -4.868378090 | 16.338054596 |
| H | 1.975827830  | -4.788715931 | 16.439402200 |
| H | 1.005133803  | -4.934333769 | 17.936188526 |
| O | 2.696825727  | -0.247640638 | 11.504772215 |
| O | 3.274100547  | 0.554000023  | 14.133894500 |
| H | 2.881931735  | 1.203760102  | 13.513070145 |
| H | 4.235781438  | 0.597211105  | 13.951224415 |
| H | 8.204626345  | -6.700635998 | 12.838235837 |
| C | 7.190526964  | -6.287087804 | 12.952173596 |
| C | 6.689186794  | -5.421278581 | 11.981600061 |
| C | 5.370527211  | -4.895410376 | 12.150637205 |
| C | 4.580520543  | -5.264543061 | 13.228117537 |
| C | 5.069887840  | -6.164749438 | 14.218800395 |
| C | 6.413896987  | -6.673930188 | 14.082906716 |
| C | 6.917513957  | -7.554004568 | 15.086952598 |
| C | 6.125019968  | -7.937843447 | 16.161753934 |
| C | 4.797584819  | -7.446609967 | 16.287788250 |
| C | 4.287208625  | -6.570748319 | 15.338486305 |
| H | 4.973212910  | -4.189807450 | 11.403730714 |
| H | 3.560767839  | -4.861694766 | 13.323225128 |
| H | 3.260713079  | -6.183387364 | 15.431285961 |
| H | 4.187575600  | -7.767157447 | 17.144125554 |
| H | 6.517205536  | -8.620449950 | 16.930730007 |
| H | 7.947201875  | -7.930557340 | 14.984047385 |
| C | 7.484775327  | -5.083476830 | 10.746228143 |
| H | 7.118301524  | -5.675529009 | 9.879818873  |
| H | 7.372822778  | -4.017397848 | 10.472346927 |
| H | 8.560107412  | -5.310804735 | 10.873326910 |

|    |              |               |              |
|----|--------------|---------------|--------------|
| O  | 6.431380509  | -5.306805974  | 21.648815864 |
| H  | 5.603452478  | -4.839449356  | 21.886910286 |
| H  | 6.642825979  | -5.824516273  | 22.453049600 |
| Mo | 5.384907594  | -7.109790353  | 20.283875574 |
| O  | 4.900520396  | -8.479316024  | 19.393461277 |
| N  | 7.846806227  | -6.290187800  | 18.574390645 |
| O  | 3.991953197  | -6.417723266  | 21.015348500 |
| N  | 7.568185888  | -7.164107807  | 19.590668394 |
| O  | 5.632978777  | -5.724995936  | 18.901196674 |
| N  | 8.429060973  | -10.666330815 | 22.502931000 |
| O  | 6.177955570  | -8.035978487  | 21.869395004 |
| N  | 7.275928704  | -9.947208986  | 22.728753588 |
| C  | 6.781865798  | -5.611370795  | 18.227968982 |
| C  | 8.535627207  | -8.019052422  | 19.923255316 |
| C  | 7.159326854  | -8.911080034  | 21.836584995 |
| C  | 8.293268853  | -8.957150117  | 20.983827727 |
| C  | 9.046856595  | -10.092284373 | 21.474321813 |
| C  | 6.421490415  | -10.314038840 | 23.806159026 |
| C  | 5.098993527  | -9.831012742  | 23.894313352 |
| H  | 4.698772999  | -9.163957372  | 23.122784089 |
| C  | 4.297561865  | -10.223235492 | 24.977292771 |
| H  | 3.266131989  | -9.845285528  | 25.040282758 |
| C  | 4.792881021  | -11.092443033 | 25.962863839 |
| H  | 4.154711013  | -11.396251803 | 26.806222523 |
| C  | 6.108410542  | -11.575995416 | 25.858266746 |
| H  | 6.507035021  | -12.262095567 | 26.621466025 |
| C  | 6.926424655  | -11.191709536 | 24.788026244 |
| H  | 7.953755144  | -11.561921147 | 24.682199371 |
| C  | 10.331175687 | -10.686923659 | 20.983399945 |
| H  | 11.193683095 | -10.009936963 | 21.156716891 |
| H  | 10.519059229 | -11.629227947 | 21.530709509 |
| H  | 10.292548543 | -10.908612757 | 19.898623122 |
| C  | 9.829702934  | -8.012293557  | 19.147022873 |
| H  | 10.104012362 | -6.954503515  | 18.967191446 |
| H  | 10.628433368 | -8.475395142  | 19.752584787 |
| C  | 9.690786384  | -8.728302372  | 17.789908994 |
| H  | 9.381120982  | -9.785672160  | 17.914612828 |
| H  | 8.930656833  | -8.216913265  | 17.168921722 |
| C  | 6.800829414  | -4.727997834  | 17.054317416 |



|    |              |              |              |
|----|--------------|--------------|--------------|
| C  | 5.650710833  | -4.002794117 | 16.701099909 |
| H  | 4.744517169  | -4.077305044 | 17.314890170 |
| O  | 12.538653936 | -3.625253526 | 14.351260031 |
| H  | 12.858785747 | -4.253957842 | 15.031538702 |
| H  | 13.328772266 | -3.474216559 | 13.792804159 |
| Mo | 11.333384048 | -5.335269309 | 12.967242925 |
| C  | 5.643871186  | -3.226013616 | 15.522423354 |
| C  | 6.790880081  | -3.158525897 | 14.715367137 |
| H  | 6.773122986  | -2.589189614 | 13.778649994 |
| C  | 7.937694281  | -3.899829869 | 15.063945853 |
| C  | 7.941366135  | -4.689545790 | 16.225981445 |
| H  | 8.815385834  | -5.301520034 | 16.479352921 |
| O  | 10.493074555 | -6.333554550 | 11.869505430 |
| N  | 9.247945367  | -3.035891337 | 13.214657573 |
| O  | 12.312929956 | -6.338311499 | 13.959579306 |
| N  | 10.307083413 | -3.350647953 | 12.400332794 |
| O  | 9.959885776  | -4.935993763 | 14.317291506 |
| N  | 13.143133052 | -2.788530693 | 8.779449926  |
| O  | 12.742969424 | -4.618042214 | 11.756116204 |
| N  | 13.468176318 | -3.792103573 | 9.664858727  |
| C  | 9.089670312  | -3.931433368 | 14.154913758 |
| C  | 10.580570375 | -2.480662324 | 11.428640708 |
| C  | 12.601559076 | -3.811884168 | 10.728520727 |
| C  | 11.657447833 | -2.772733812 | 10.523711955 |
| C  | 12.075273704 | -2.168784781 | 9.275976519  |
| C  | 14.609881230 | -4.604957336 | 9.420096584  |
| C  | 14.767078208 | -5.855954385 | 10.052153571 |
| H  | 14.002542582 | -6.229289279 | 10.742982421 |
| C  | 15.909977138 | -6.622374243 | 9.777883334  |
| H  | 16.026414058 | -7.599504134 | 10.269846602 |
| C  | 16.886638389 | -6.162259270 | 8.879498625  |
| H  | 17.777417801 | -6.773040507 | 8.669041094  |
| C  | 16.712856359 | -4.919405299 | 8.246520647  |
| H  | 17.469322202 | -4.550849321 | 7.536709663  |
| C  | 15.581757807 | -4.136541083 | 8.512245718  |
| H  | 15.421787723 | -3.166589860 | 8.024706842  |
| C  | 11.474759526 | -1.035836717 | 8.501440011  |
| H  | 11.582255425 | -0.067594311 | 9.033877046  |
| H  | 11.994992170 | -0.953548902 | 7.529303436  |

|   |              |              |              |
|---|--------------|--------------|--------------|
| H | 10.394092858 | -1.192518915 | 8.312932339  |
| C | 9.767362772  | -1.213699071 | 11.300310483 |
| H | 9.594536589  | -0.835621274 | 12.327436619 |
| H | 10.365209203 | -0.459228927 | 10.757670636 |
| C | 8.404681398  | -1.412240072 | 10.614370403 |
| H | 8.511620749  | -1.866692921 | 9.609359838  |
| H | 7.761918161  | -2.073463680 | 11.225264866 |
| H | 10.653252264 | -8.711079682 | 17.240760248 |
| H | 7.886871680  | -0.439902829 | 10.497811772 |

**3'a**

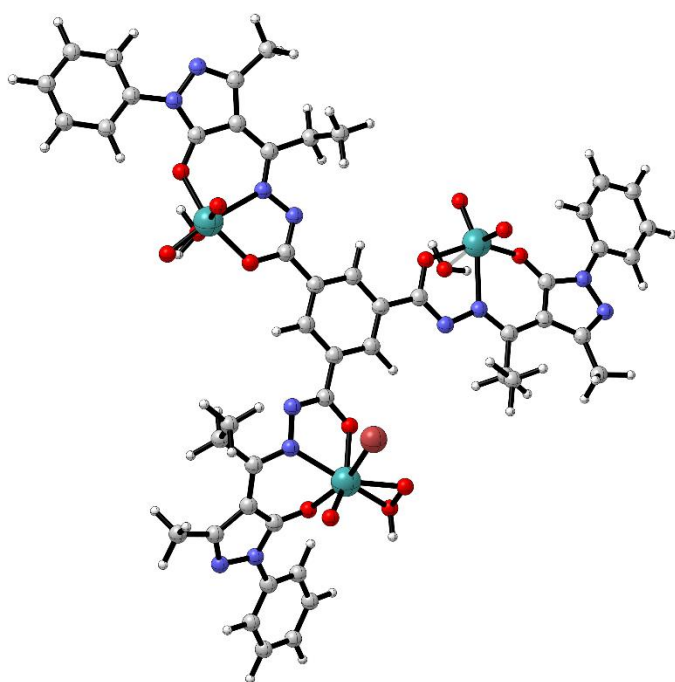

|    |               |               |               |
|----|---------------|---------------|---------------|
| Mo | -32.824735452 | -14.495868848 | -30.052540993 |
| O  | -32.871181481 | -15.745026299 | -28.897351473 |
| N  | -31.127131624 | -15.342384769 | -32.421544465 |
| O  | -34.561589160 | -13.571587322 | -29.976079099 |
| N  | -31.203134916 | -15.493559139 | -31.075562224 |
| O  | -32.464541201 | -13.580172098 | -31.866784294 |
| N  | -28.944704639 | -15.672413286 | -27.082324993 |
| O  | -31.203341481 | -13.770186470 | -28.994547635 |
| N  | -29.697328049 | -14.543144366 | -27.342023116 |
| C  | -31.825648932 | -14.273927891 | -32.779055850 |
| C  | -30.249987397 | -16.224600368 | -30.464403639 |
| C  | -30.382856890 | -14.662048610 | -28.525447204 |
| C  | -29.992199283 | -15.923058435 | -29.099286744 |

|    |               |               |               |
|----|---------------|---------------|---------------|
| C  | -29.092599884 | -16.490192605 | -28.116408285 |
| C  | -29.765437680 | -13.504708061 | -26.373765400 |
| C  | -30.263365590 | -12.228992194 | -26.712262591 |
| H  | -30.589169173 | -12.019986786 | -27.737776698 |
| C  | -30.327095405 | -11.234945872 | -25.723841401 |
| H  | -30.715715053 | -10.240265729 | -25.990203248 |
| C  | -29.889224423 | -11.492771733 | -24.414750096 |
| H  | -29.939024700 | -10.704880258 | -23.648172540 |
| C  | -29.379091932 | -12.762977943 | -24.094646875 |
| H  | -29.025378414 | -12.975182496 | -23.074347750 |
| C  | -29.316026216 | -13.771987250 | -25.064333431 |
| H  | -28.920370143 | -14.769724681 | -24.837123616 |
| C  | -28.397396653 | -17.816021744 | -28.117075640 |
| H  | -27.529034412 | -17.826540889 | -28.808930728 |
| H  | -28.019441415 | -18.027783463 | -27.099717071 |
| H  | -29.082546270 | -18.630466678 | -28.424336928 |
| C  | -29.437207633 | -17.193423583 | -31.282277855 |
| H  | -29.032583354 | -16.639099925 | -32.153477126 |
| H  | -28.578848784 | -17.551841560 | -30.687467673 |
| C  | -30.299086811 | -18.367614474 | -31.782349957 |
| H  | -30.712825722 | -18.950572486 | -30.935646548 |
| H  | -31.145839556 | -17.994896143 | -32.390797187 |
| H  | -29.691479514 | -19.048151627 | -32.411078756 |
| O  | -33.684083118 | -12.659861376 | -29.186809492 |
| H  | -33.926879090 | -12.863555282 | -28.249542200 |
| Br | -34.339950082 | -15.957941536 | -31.539061019 |
| O  | -26.969174537 | -14.606263870 | -38.086199459 |
| H  | -26.461176517 | -14.956757678 | -37.324289399 |
| H  | -26.354507062 | -14.718076876 | -38.840716857 |
| Mo | -28.347507017 | -16.666606398 | -38.389844174 |
| O  | -29.310775284 | -17.995071570 | -38.834734312 |
| N  | -30.398350522 | -14.358939456 | -38.786194572 |
| O  | -27.182572348 | -17.213778804 | -37.249734166 |
| N  | -29.546812687 | -15.100571252 | -39.561625899 |
| O  | -29.477031722 | -15.660883174 | -37.116093460 |
| N  | -27.597631443 | -16.541217800 | -43.512965819 |
| O  | -27.189982257 | -16.554584052 | -40.017425427 |
| N  | -26.973456091 | -16.919551792 | -42.344163687 |
| C  | -30.326874341 | -14.717596003 | -37.529068489 |

|    |               |               |               |
|----|---------------|---------------|---------------|
| C  | -29.619199061 | -14.912271243 | -40.879611466 |
| C  | -27.616223170 | -16.395204777 | -41.251764829 |
| C  | -28.717814219 | -15.638212441 | -41.730596577 |
| C  | -28.631221882 | -15.778026476 | -43.169449827 |
| C  | -25.796122503 | -17.716868311 | -42.404885220 |
| C  | -25.296671012 | -18.381932871 | -41.265370401 |
| H  | -25.816646048 | -18.305594266 | -40.304385368 |
| C  | -24.127612304 | -19.149636629 | -41.378266450 |
| H  | -23.742142731 | -19.665788050 | -40.486151604 |
| C  | -23.459102965 | -19.269154808 | -42.607565518 |
| H  | -22.541809787 | -19.871652597 | -42.684333588 |
| C  | -23.974451055 | -18.614009061 | -43.739210070 |
| H  | -23.464224419 | -18.703389265 | -44.710376231 |
| C  | -25.136669962 | -17.837764073 | -43.645868939 |
| H  | -25.559729257 | -17.321133542 | -44.516455240 |
| C  | -29.514081836 | -15.236027219 | -44.251052993 |
| H  | -29.435890688 | -14.132000426 | -44.334761738 |
| H  | -29.203909687 | -15.677525346 | -45.216252037 |
| H  | -30.580512051 | -15.481026643 | -44.074770578 |
| C  | -30.668867114 | -13.988074102 | -41.444485868 |
| H  | -30.746423696 | -13.115279244 | -40.768075087 |
| H  | -30.349043724 | -13.625317285 | -42.437287925 |
| C  | -32.045130215 | -14.676359894 | -41.533336475 |
| H  | -32.012573376 | -15.573779951 | -42.184002558 |
| H  | -32.378849384 | -14.994996570 | -40.527397866 |
| C  | -31.178847411 | -14.079191217 | -36.511025115 |
| C  | -31.088149273 | -14.481959585 | -35.166653262 |
| H  | -30.391300493 | -15.280196554 | -34.877961817 |
| O  | -33.470132709 | -8.201238813  | -37.397633891 |
| H  | -32.957797654 | -8.152048610  | -38.232268688 |
| H  | -33.981962346 | -7.366212866  | -37.394549131 |
| Mo | -35.206175445 | -9.760531455  | -38.288924139 |
| C  | -31.894129128 | -13.857645144 | -34.190191070 |
| C  | -32.791195077 | -12.842038028 | -34.559112201 |
| H  | -33.424612998 | -12.367364510 | -33.798833446 |
| C  | -32.889590598 | -12.445214155 | -35.910832941 |
| C  | -32.082333885 | -13.059163136 | -36.883417097 |
| H  | -32.153734927 | -12.749698350 | -37.934200373 |
| O  | -36.537313237 | -10.728267262 | -38.717632751 |

|   |               |               |               |
|---|---------------|---------------|---------------|
| N | -34.633258294 | -10.836088917 | -35.425203950 |
| O | -34.354138440 | -9.349216439  | -39.724540674 |
| N | -35.481681383 | -9.939678060  | -36.019537819 |
| O | -33.881465681 | -11.055121900 | -37.597114261 |
| N | -38.987646295 | -6.911986395  | -36.186224777 |
| O | -36.169355453 | -8.038709260  | -37.966386047 |
| N | -38.157346527 | -6.958241973  | -37.284621582 |
| C | -33.847317783 | -11.398684910 | -36.307645852 |
| C | -36.419691518 | -9.400240199  | -35.240451605 |
| C | -37.137148776 | -7.854950813  | -37.095665052 |
| C | -37.312393475 | -8.429008451  | -35.808721294 |
| C | -38.500198825 | -7.775512880  | -35.299204430 |
| C | -38.406578235 | -6.101238209  | -38.392128810 |
| C | -37.869709691 | -6.377386277  | -39.666645598 |
| H | -37.255079846 | -7.270238447  | -39.829211236 |
| C | -38.142179247 | -5.501420304  | -40.728208365 |
| H | -37.723473558 | -5.721014824  | -41.721793238 |
| C | -38.947502810 | -4.366811962  | -40.536552876 |
| H | -39.158532592 | -3.688052243  | -41.376608498 |
| C | -39.488143483 | -4.109747108  | -39.264768105 |
| H | -40.124641332 | -3.226357548  | -39.102746909 |
| C | -39.221813618 | -4.968912632  | -38.190667833 |
| H | -39.639588225 | -4.793866093  | -37.191143885 |
| C | -39.224846651 | -7.958382231  | -34.001331532 |
| H | -38.633215395 | -7.583510488  | -33.140307540 |
| H | -40.171468612 | -7.388866074  | -34.040118943 |
| H | -39.460004510 | -9.023766210  | -33.807512186 |
| C | -36.546524444 | -9.850670315  | -33.806242018 |
| H | -35.522663961 | -9.967884869  | -33.400925472 |
| H | -37.062338042 | -9.071221019  | -33.218222974 |
| C | -37.286017655 | -11.197696811 | -33.688139386 |
| H | -38.309523311 | -11.139233839 | -34.110062685 |
| H | -36.734524849 | -11.987322497 | -34.233681022 |
| H | -32.800535516 | -13.976818149 | -41.942930458 |
| H | -37.364162798 | -11.504209398 | -32.626506128 |

## Styrene epoxide

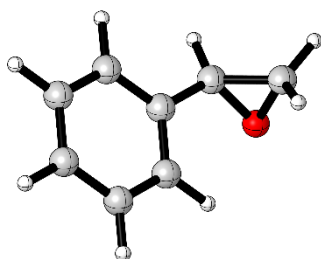

|   |              |              |              |
|---|--------------|--------------|--------------|
| C | -0.498291000 | 0.309113000  | 0.622157000  |
| C | -1.733912000 | 0.168144000  | 1.278039000  |
| C | 0.642963000  | 0.695555000  | 1.340436000  |
| H | -2.629117000 | -0.134278000 | 0.713573000  |
| H | 1.613063000  | 0.832689000  | 0.838764000  |
| C | -1.823549000 | 0.424209000  | 2.656679000  |
| C | 0.560505000  | 0.942596000  | 2.725993000  |
| H | -2.790054000 | 0.323746000  | 3.174526000  |
| C | -0.682838000 | 0.814177000  | 3.376136000  |
| H | -0.758007000 | 1.024564000  | 4.455337000  |
| H | -0.424707000 | 0.120930000  | -0.460236000 |
| C | 1.779452000  | 1.320825000  | 3.503045000  |
| H | 1.591324000  | 1.918540000  | 4.417279000  |
| C | 3.005820000  | 0.483255000  | 3.482016000  |
| H | 3.005143000  | -0.436373000 | 2.865597000  |
| H | 3.678877000  | 0.469941000  | 4.361324000  |
| O | 2.942275000  | 1.714204000  | 2.760181000  |

## Styrene

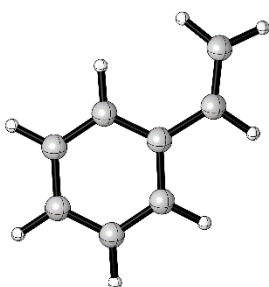

|   |              |              |             |
|---|--------------|--------------|-------------|
| C | -0.689758000 | 0.821409000  | 0.590813000 |
| C | -1.733547000 | 0.223222000  | 1.314859000 |
| C | 0.546908000  | 1.058996000  | 1.208971000 |
| H | -2.705507000 | 0.032699000  | 0.834588000 |
| H | 1.364187000  | 1.527707000  | 0.637216000 |
| C | -1.527375000 | -0.133770000 | 2.660726000 |

|   |              |              |              |
|---|--------------|--------------|--------------|
| C | 0.771515000  | 0.708221000  | 2.561603000  |
| H | -2.340905000 | -0.603862000 | 3.234746000  |
| C | -0.293029000 | 0.104790000  | 3.275812000  |
| H | -0.149187000 | -0.184088000 | 4.327700000  |
| H | -0.839409000 | 1.105289000  | -0.462089000 |
| C | 2.087866000  | 0.982292000  | 3.162766000  |
| H | 2.822838000  | 1.432025000  | 2.471379000  |
| C | 2.472967000  | 0.747918000  | 4.436138000  |
| H | 1.798075000  | 0.305768000  | 5.186497000  |
| H | 3.489700000  | 0.997765000  | 4.773699000  |

### CH<sub>3</sub>COOOH

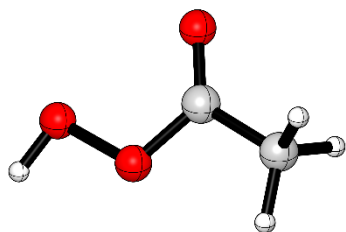

|   |             |              |              |
|---|-------------|--------------|--------------|
| O | 5.281330000 | -5.806897000 | 6.490189000  |
| O | 5.140124000 | -6.334588000 | 7.844207000  |
| O | 5.852907000 | -4.253759000 | 8.487791000  |
| C | 5.487168000 | -5.370214000 | 8.760690000  |
| C | 5.324708000 | -5.969716000 | 10.144805000 |
| H | 6.298797000 | -5.909772000 | 10.669144000 |
| H | 4.600191000 | -5.352027000 | 10.711267000 |
| H | 4.978708000 | -7.018896000 | 10.119383000 |
| H | 4.967522000 | -6.609779000 | 6.021865000  |

### CH<sub>3</sub>COOH

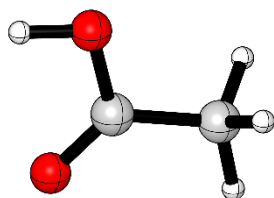

|   |             |              |              |
|---|-------------|--------------|--------------|
| H | 5.052003000 | -5.702546000 | 6.917957000  |
| O | 4.826377000 | -6.109920000 | 7.783403000  |
| O | 6.325234000 | -4.529171000 | 8.393435000  |
| C | 5.571364000 | -5.432031000 | 8.701810000  |
| C | 5.328373000 | -5.950325000 | 10.100394000 |

|   |             |              |              |
|---|-------------|--------------|--------------|
| H | 5.938632000 | -5.377832000 | 10.818883000 |
| H | 4.253556000 | -5.861809000 | 10.357158000 |
| H | 5.586641000 | -7.027031000 | 10.156092000 |

## Naphthalene

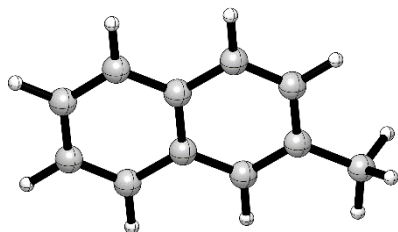

|   |              |              |              |
|---|--------------|--------------|--------------|
| H | 0.632138000  | -2.915241000 | 12.237376000 |
| C | 0.667013000  | -2.419448000 | 13.220566000 |
| C | 0.701145000  | -1.034387000 | 13.309157000 |
| C | 0.745614000  | -0.400371000 | 14.581613000 |
| C | 0.755000000  | -1.159936000 | 15.743586000 |
| C | 0.720658000  | -2.585336000 | 15.687323000 |
| C | 0.675814000  | -3.227599000 | 14.395476000 |
| C | 0.641799000  | -4.653610000 | 14.348449000 |
| C | 0.651152000  | -5.405846000 | 15.511260000 |
| C | 0.695243000  | -4.784422000 | 16.799241000 |
| C | 0.729065000  | -3.394745000 | 16.862261000 |
| H | 0.693971000  | -0.422592000 | 12.394158000 |
| H | 0.773174000  | 0.698866000  | 14.642686000 |
| H | 0.789891000  | -0.669393000 | 16.729361000 |
| H | 0.763941000  | -2.893159000 | 17.843309000 |
| H | 0.623637000  | -6.506131000 | 15.449923000 |
| H | 0.606975000  | -5.151114000 | 13.366123000 |
| C | 0.704106000  | -5.638135000 | 18.043150000 |
| H | -0.197895000 | -6.284865000 | 18.094169000 |
| H | 1.583752000  | -6.316873000 | 18.059609000 |
| H | 0.733145000  | -5.022365000 | 18.962780000 |



## Phenol

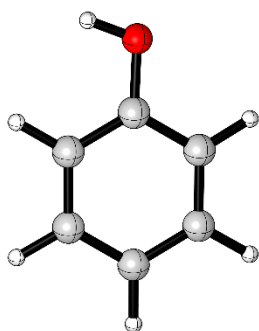

|   |             |             |              |
|---|-------------|-------------|--------------|
| C | 4.093923000 | 4.055395000 | 9.244492000  |
| C | 2.881909000 | 4.052370000 | 9.965740000  |
| C | 5.320189000 | 4.046433000 | 9.941336000  |
| C | 2.899509000 | 4.040351000 | 11.369519000 |
| C | 5.324094000 | 4.034529000 | 11.342622000 |
| C | 4.118181000 | 4.031312000 | 12.067139000 |
| H | 1.922237000 | 4.059576000 | 9.421322000  |
| H | 6.255965000 | 4.048926000 | 9.363616000  |
| H | 1.946020000 | 4.037981000 | 11.920054000 |
| H | 6.286703000 | 4.027458000 | 11.877274000 |
| H | 4.129302000 | 4.021538000 | 13.167344000 |
| O | 4.137355000 | 4.066861000 | 7.880300000  |
| H | 3.221335000 | 4.070942000 | 7.544573000  |

## o-Bromophenol

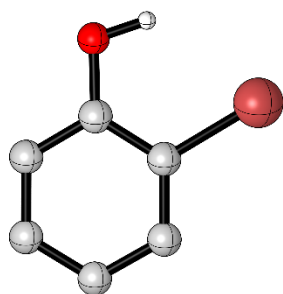

|    |              |              |              |
|----|--------------|--------------|--------------|
| C  | -0.890734000 | 0.635809000  | 13.074295000 |
| C  | -0.965423000 | -0.604610000 | 12.394362000 |
| Br | -0.486471000 | -2.180640000 | 13.378257000 |
| C  | -1.371933000 | -0.693201000 | 11.056688000 |
| H  | -1.417566000 | -1.676083000 | 10.566202000 |
| C  | -1.716178000 | 0.478051000  | 10.363378000 |
| H  | -2.038672000 | 0.415449000  | 9.314225000  |
| C  | -1.647557000 | 1.719874000  | 11.020385000 |
| H  | -1.916656000 | 2.641914000  | 10.483733000 |

|   |              |              |              |
|---|--------------|--------------|--------------|
| C | -1.240526000 | 1.800521000  | 12.357974000 |
| H | -1.182332000 | 2.763933000  | 12.885397000 |
| O | -0.503152000 | 0.749332000  | 14.364457000 |
| H | -0.301030000 | -0.157208000 | 14.691158000 |

### HBr

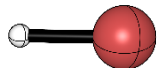

|    |             |              |              |
|----|-------------|--------------|--------------|
| Br | 0.541700000 | -0.080282000 | -3.049753000 |
| H  | 1.156954000 | -0.961308000 | -2.097324000 |

### H<sub>2</sub>O<sub>2</sub>

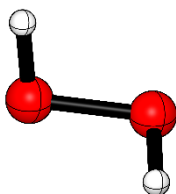

|   |             |              |              |
|---|-------------|--------------|--------------|
| O | 0.639307000 | -0.220052000 | -2.898655000 |
| O | 0.606222000 | 1.007571000  | -2.106667000 |
| H | 1.059347000 | -0.821538000 | -2.248421000 |
| H | 1.157021000 | 1.584089000  | -2.676878000 |

### H<sub>2</sub>O

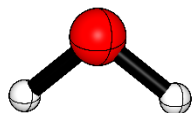

|   |             |              |              |
|---|-------------|--------------|--------------|
| O | 0.841883000 | 0.000000000  | -2.822519000 |
| H | 0.841883000 | 0.758979000  | -2.210228000 |
| H | 0.841883000 | -0.758979000 | -2.210228000 |

### HCO<sub>3</sub><sup>-</sup>

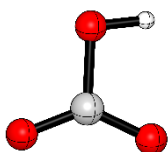

|   |              |             |             |
|---|--------------|-------------|-------------|
| O | -0.443830000 | 2.212447000 | 1.252114000 |
| O | -0.464127000 | 0.727707000 | 3.004791000 |

|   |              |             |             |
|---|--------------|-------------|-------------|
| C | -0.456011000 | 1.846329000 | 2.458727000 |
| O | -0.461697000 | 2.971827000 | 3.396361000 |
| H | -0.453418000 | 3.708887000 | 2.753676000 |

### HCO<sub>4</sub><sup>-</sup>

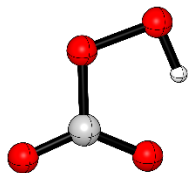

|   |              |             |             |
|---|--------------|-------------|-------------|
| O | -0.943685000 | 2.511857000 | 1.519926000 |
| O | -0.300132000 | 0.698334000 | 2.781194000 |
| C | -0.531620000 | 1.891579000 | 2.545783000 |
| O | -0.273340000 | 2.739793000 | 3.687032000 |
| O | -0.575012000 | 4.139315000 | 3.313184000 |
| H | -0.849957000 | 3.879954000 | 2.359430000 |

### HOBr

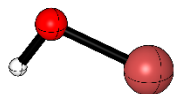

|    |              |              |              |
|----|--------------|--------------|--------------|
| O  | -0.213692000 | 0.337031000  | 14.667713000 |
| H  | -0.336896000 | -0.490002000 | 15.182571000 |
| Br | 1.643593000  | 0.552610000  | 14.744590000 |

\*\*\*\*\*
